# Supplementary material for: Novel Genetic Variants of Hepatitis B Virus in Fulminant Hepatitis
Source: Hindawi journal article supplement (doi:10.1155/2017/1231204), 2017-01-01
Supplement: f1 [file 1231204.f1.pdf]

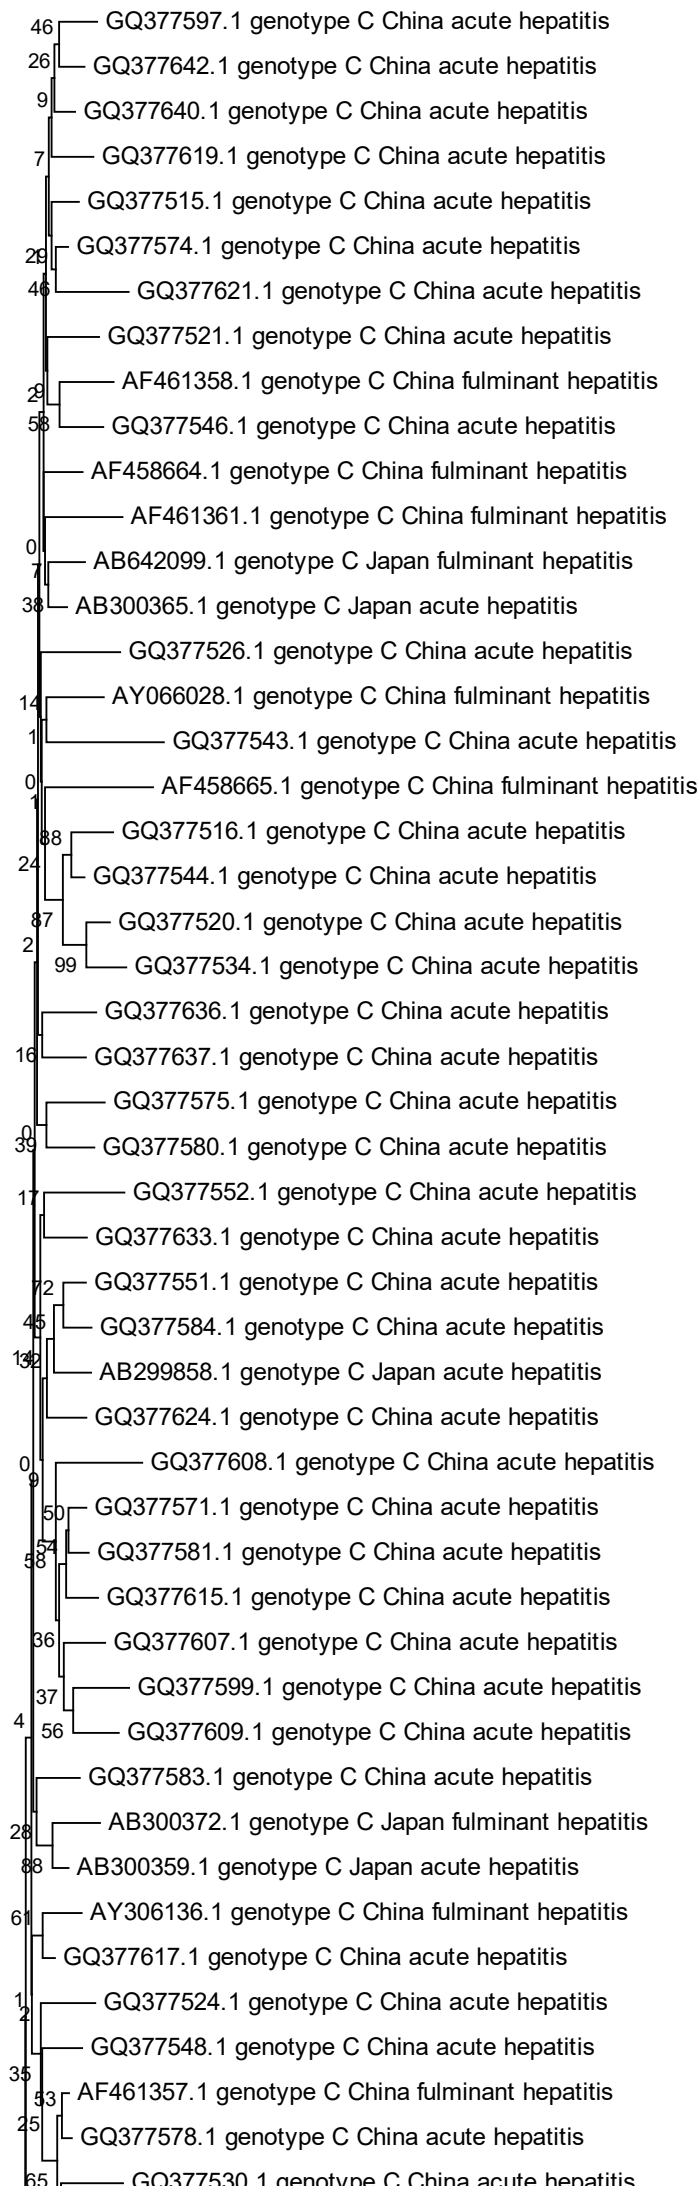

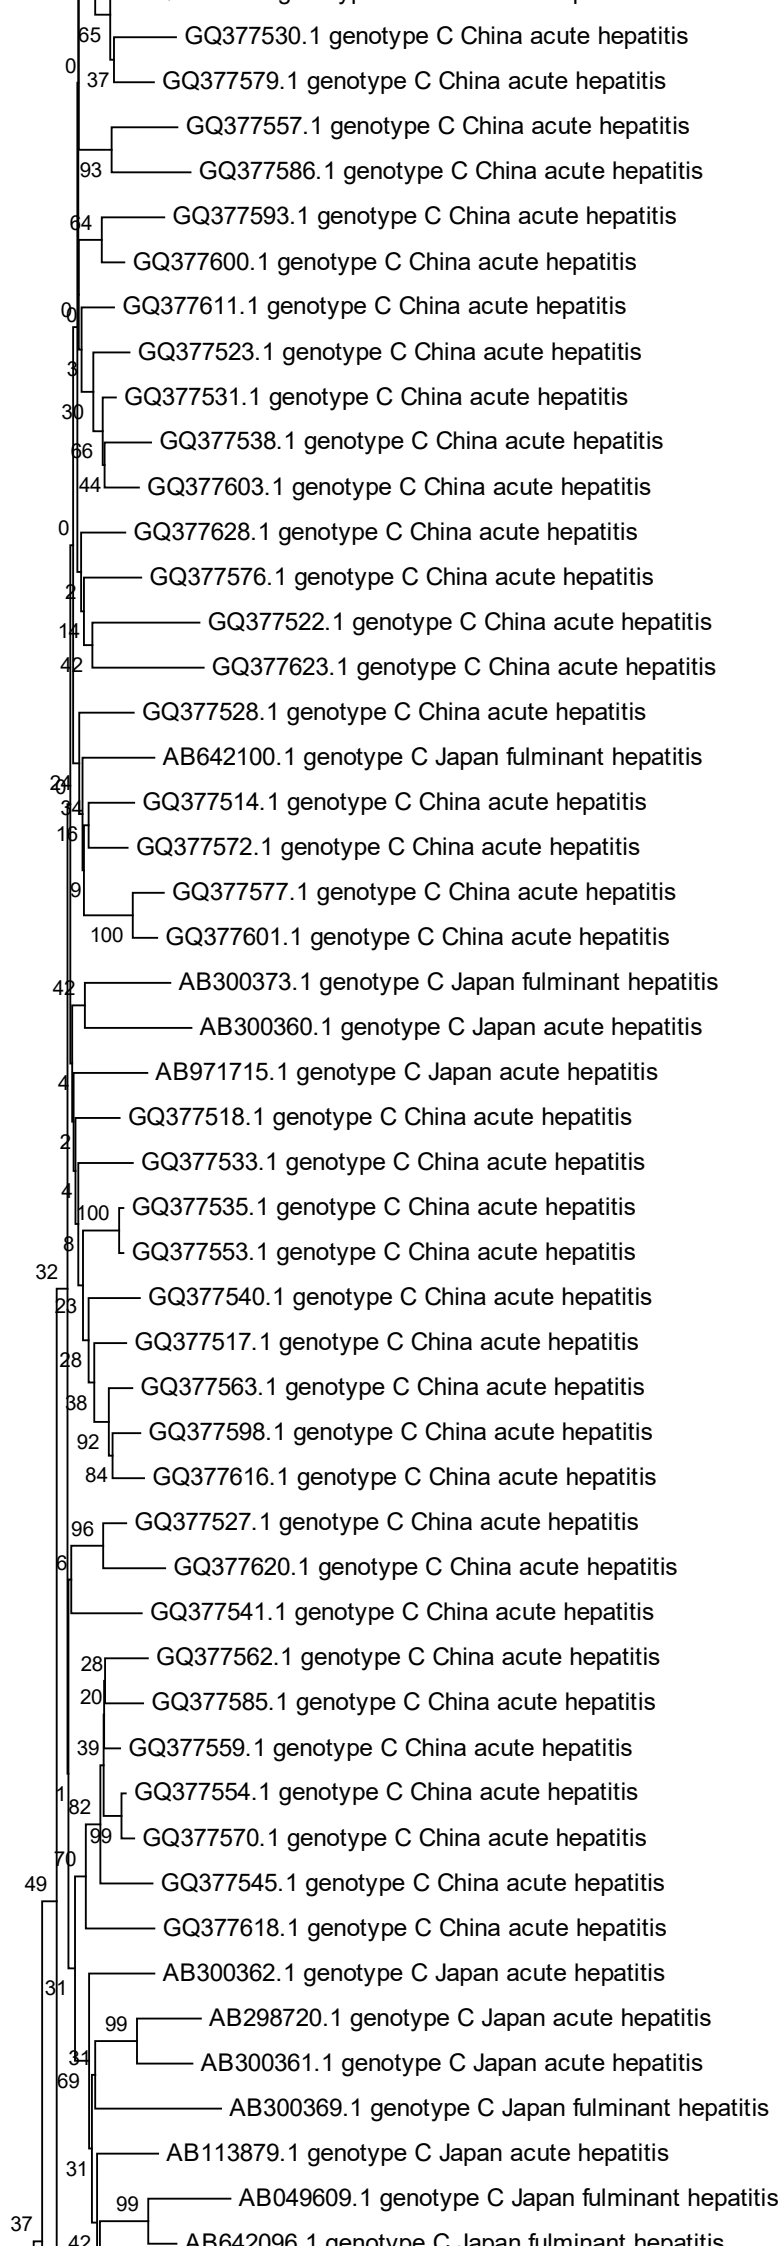

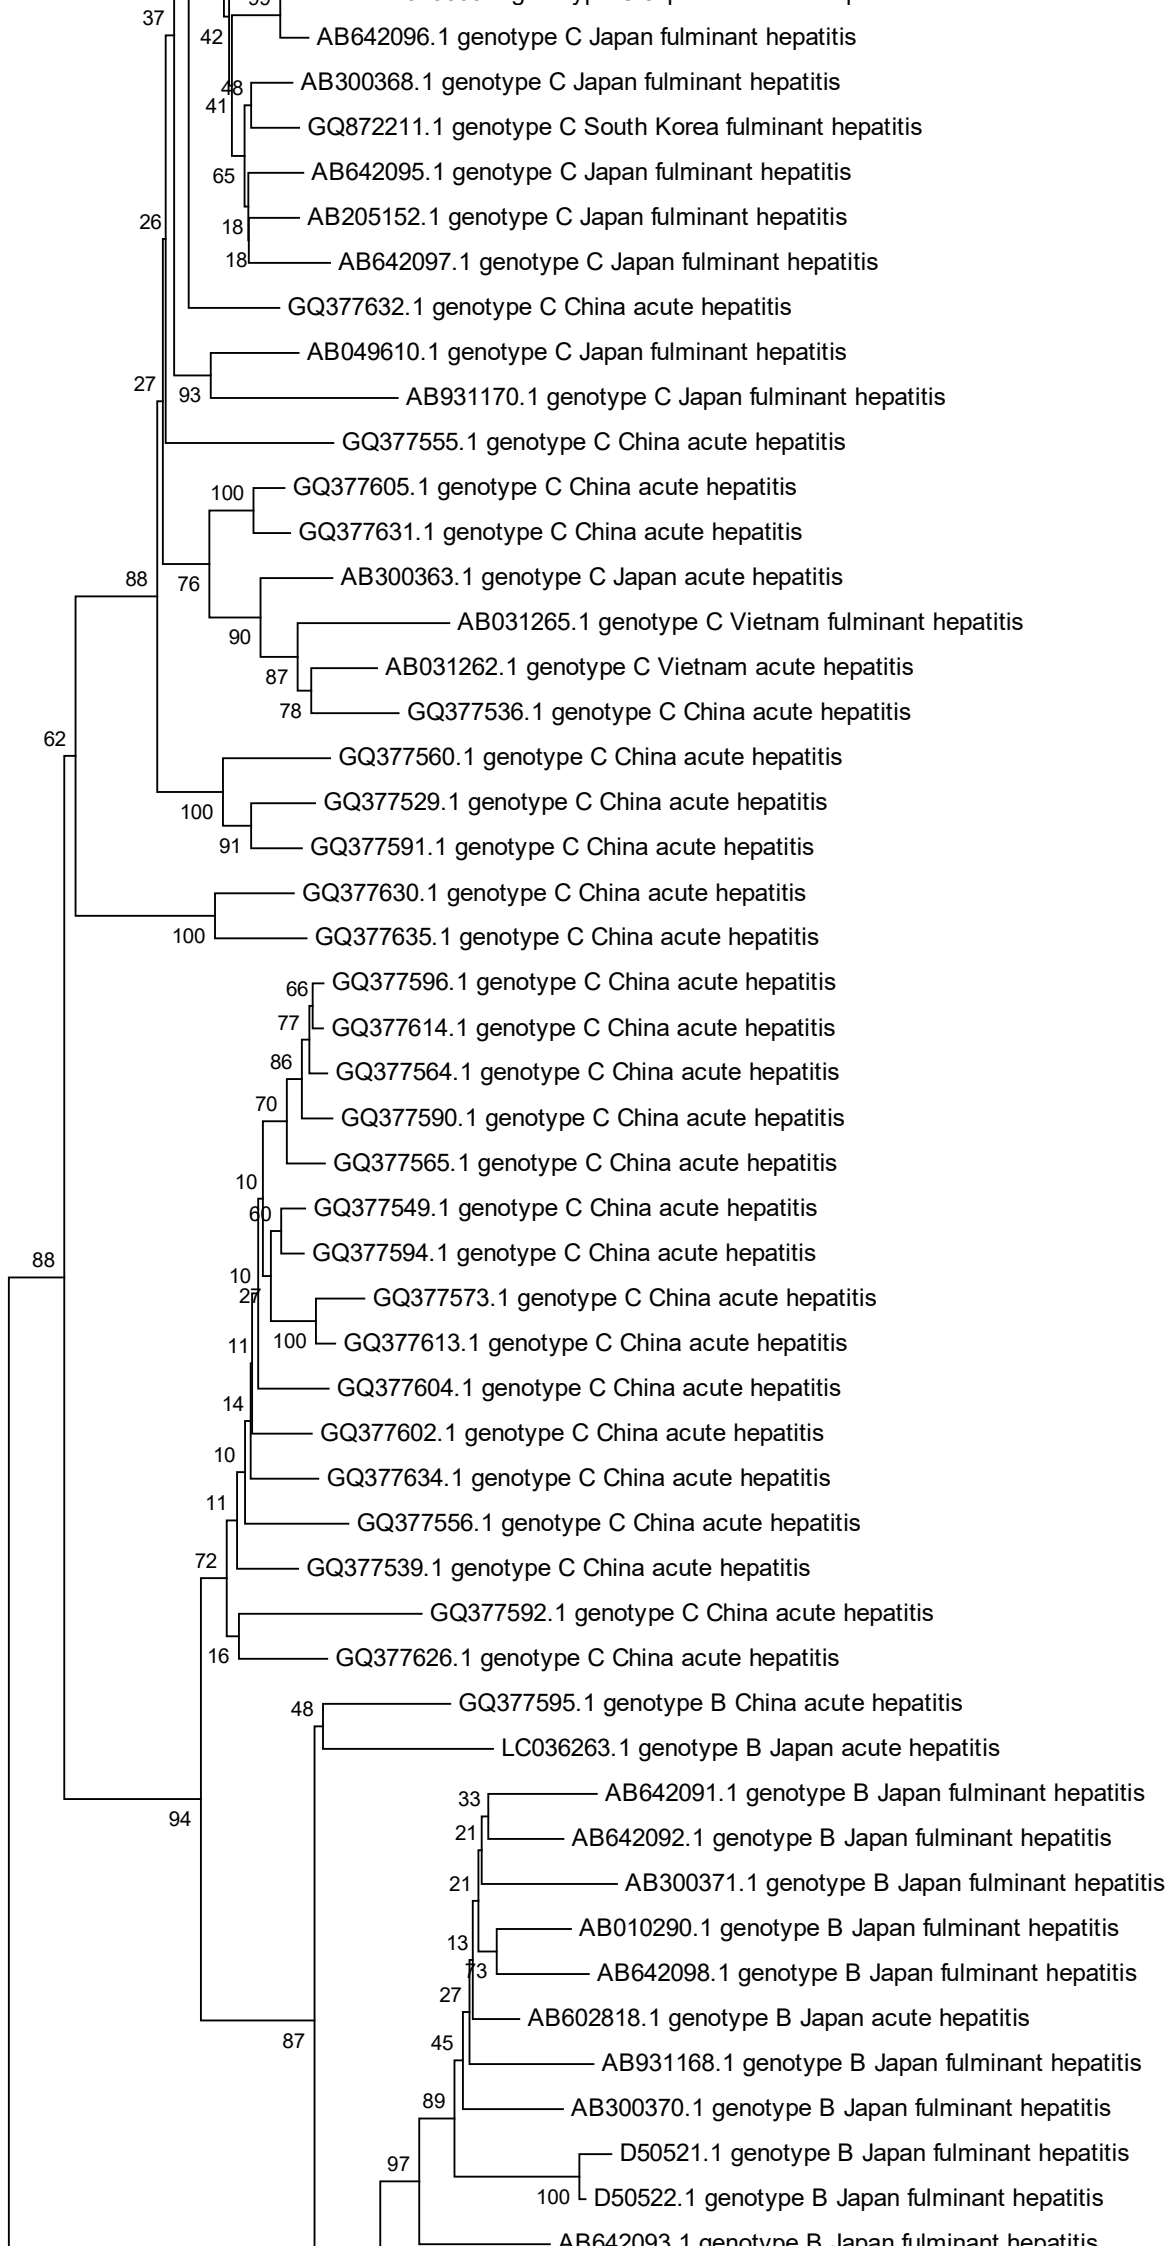

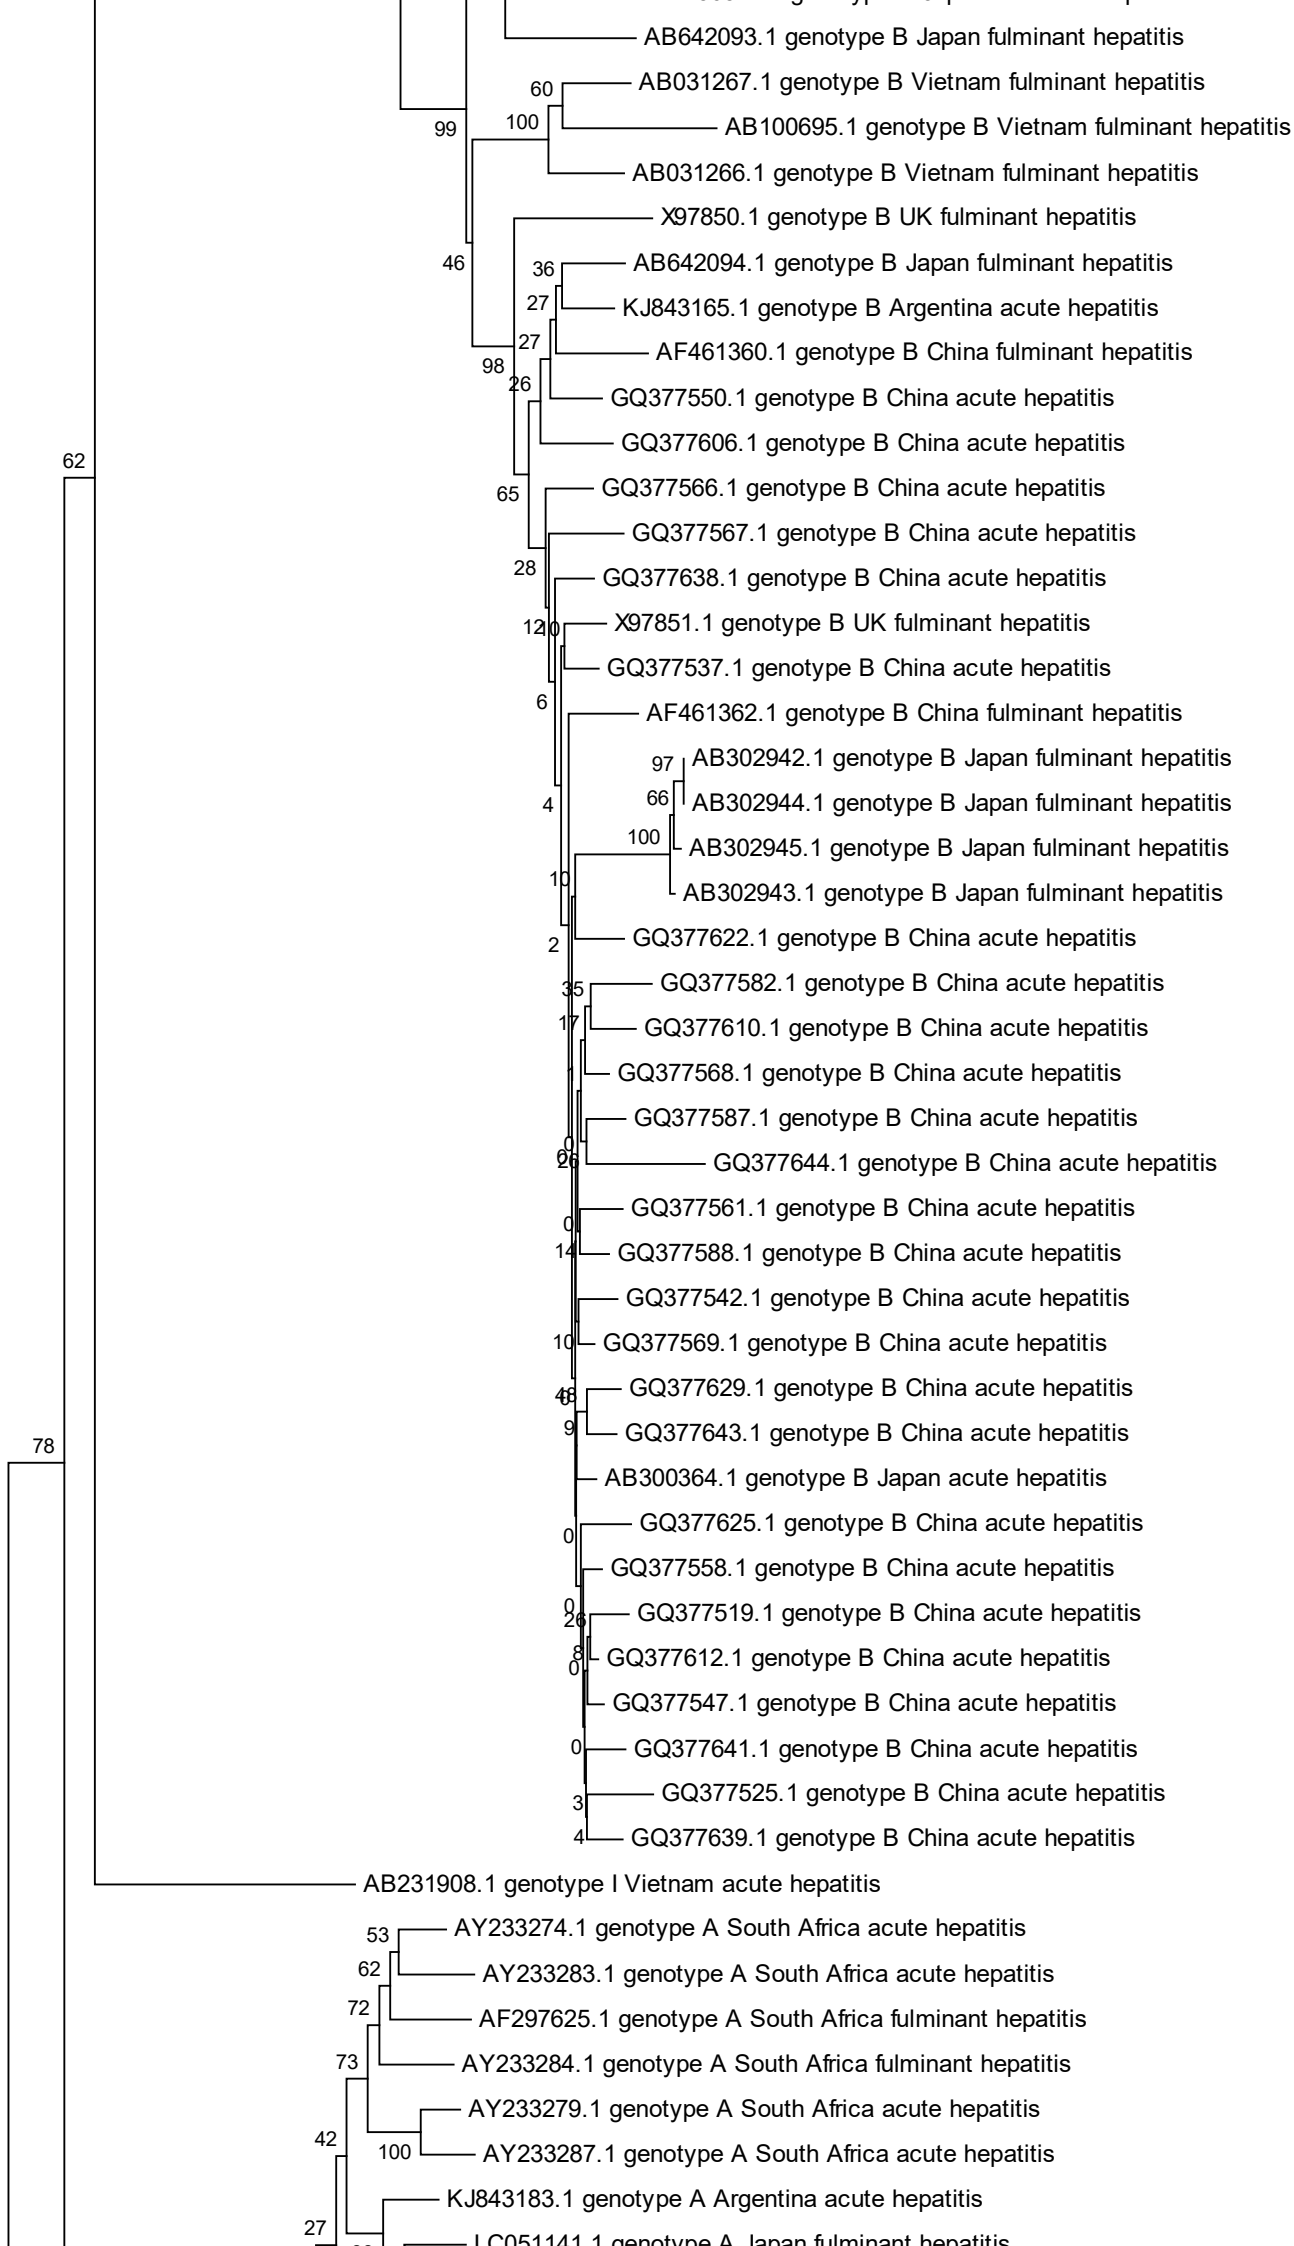

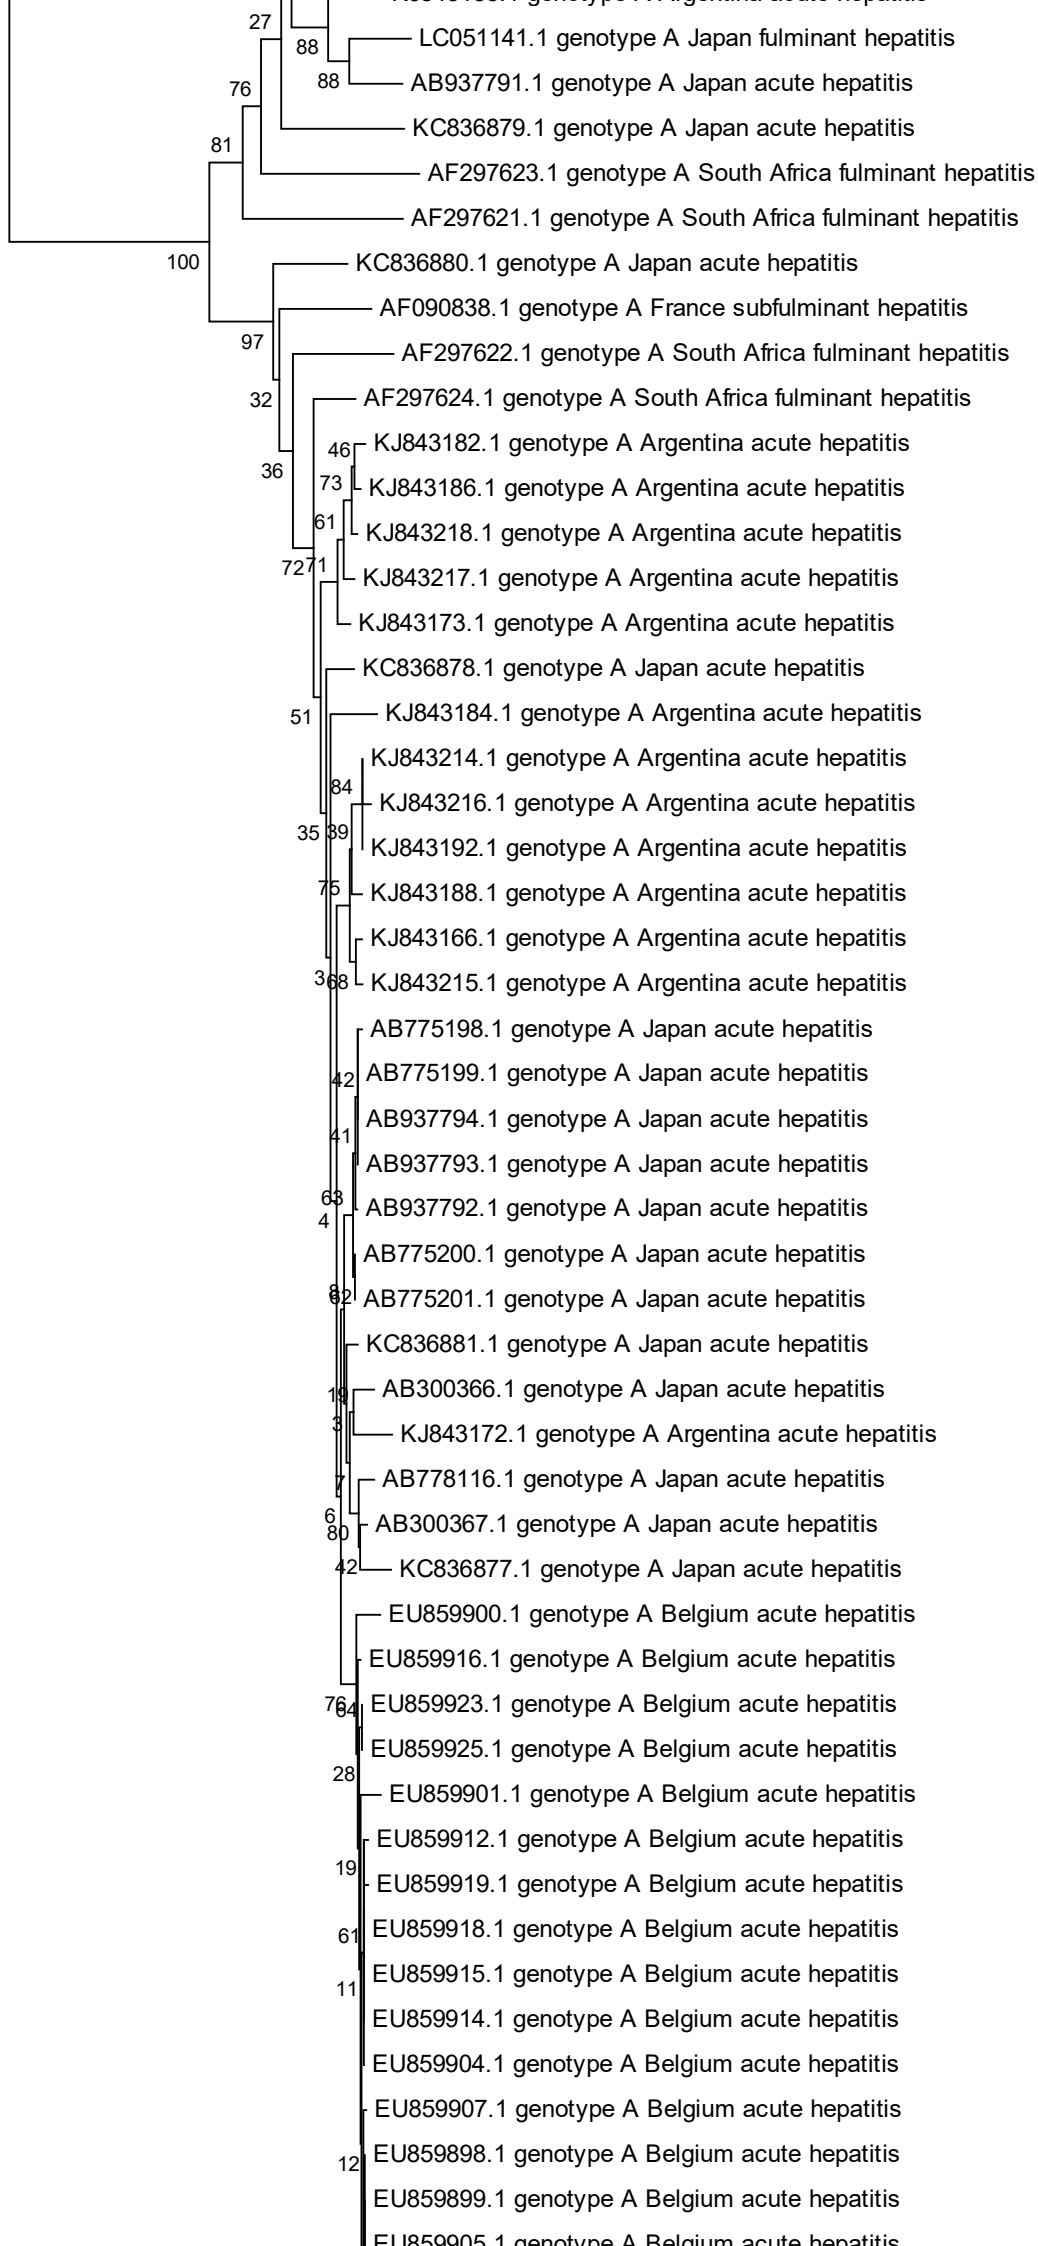

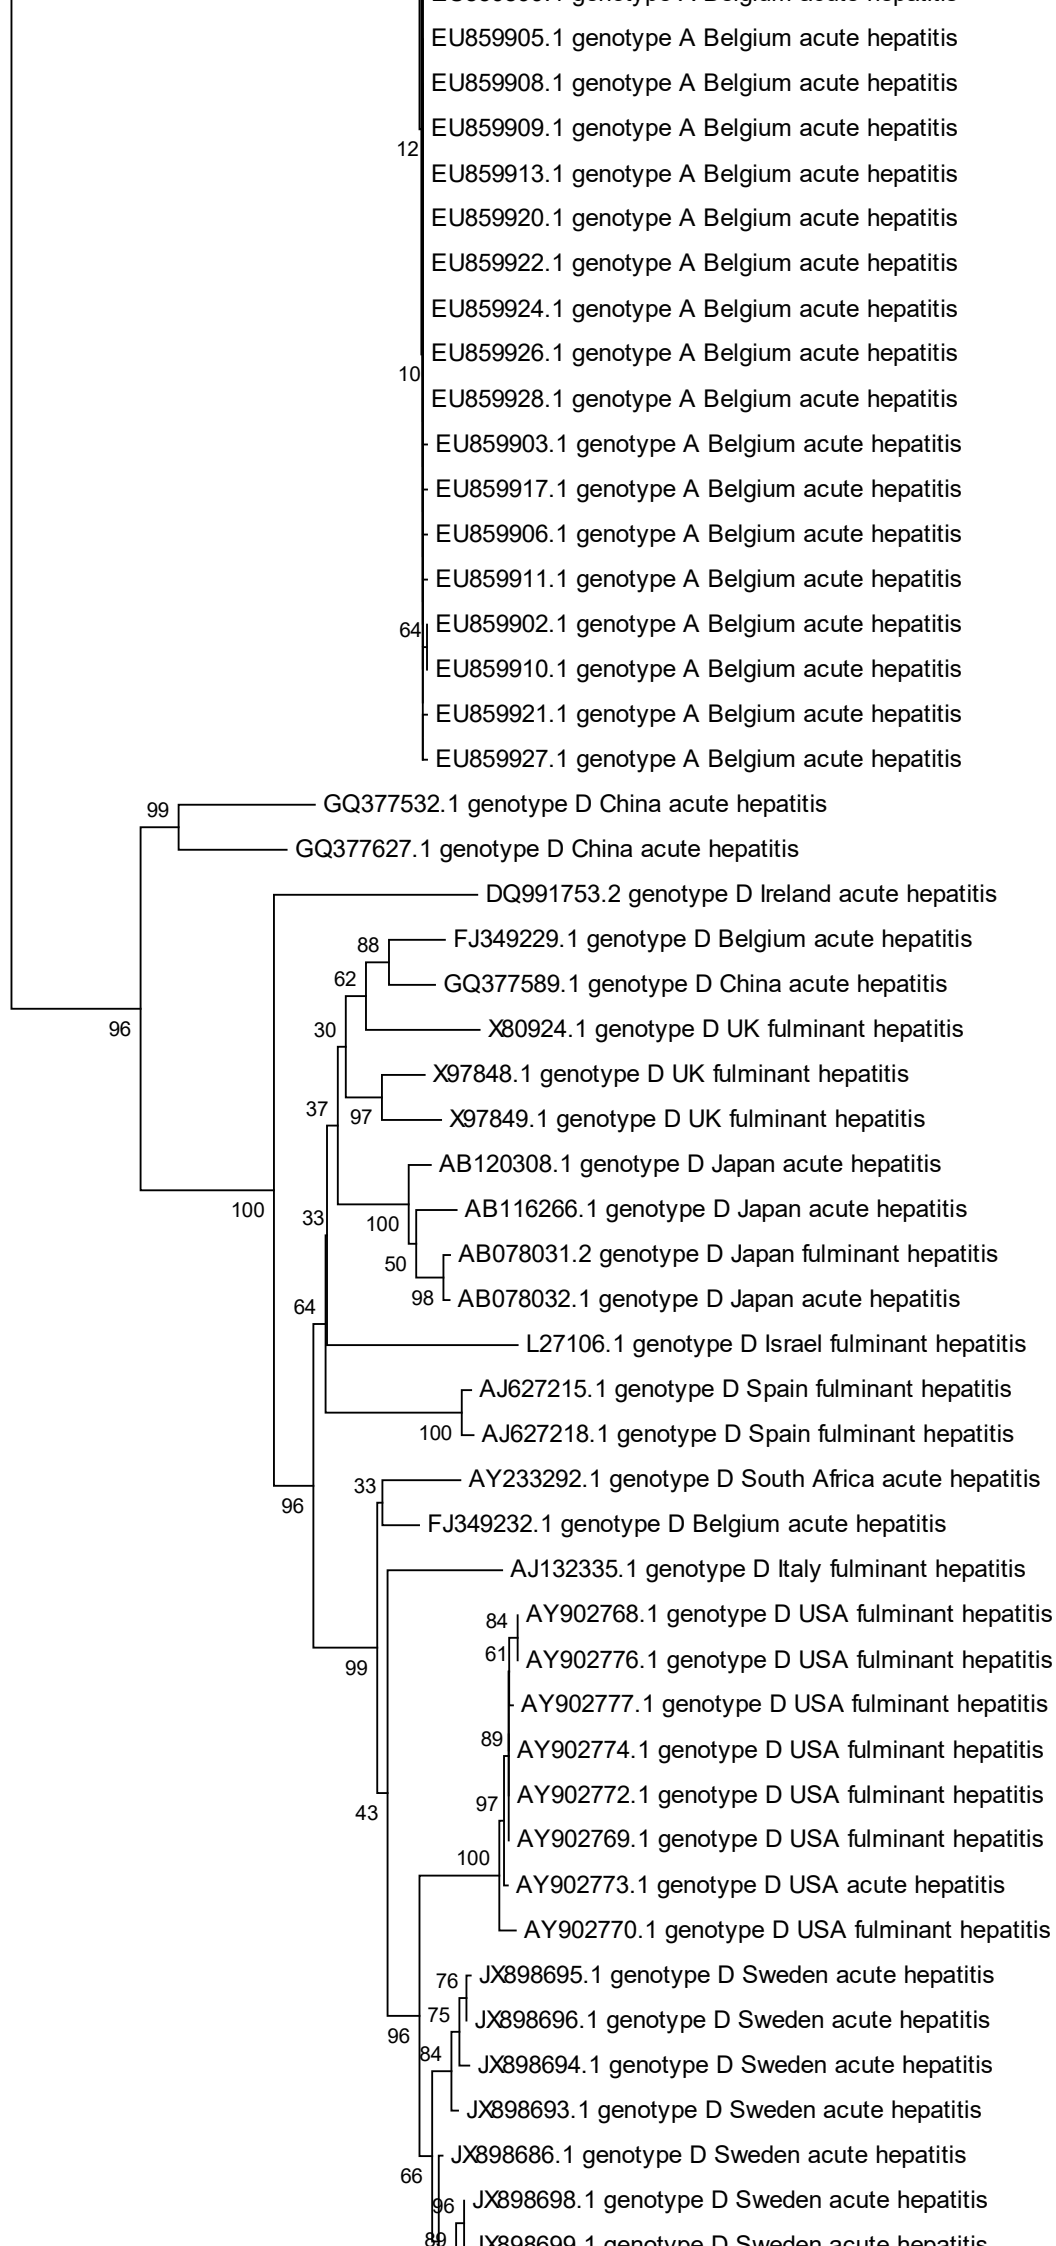

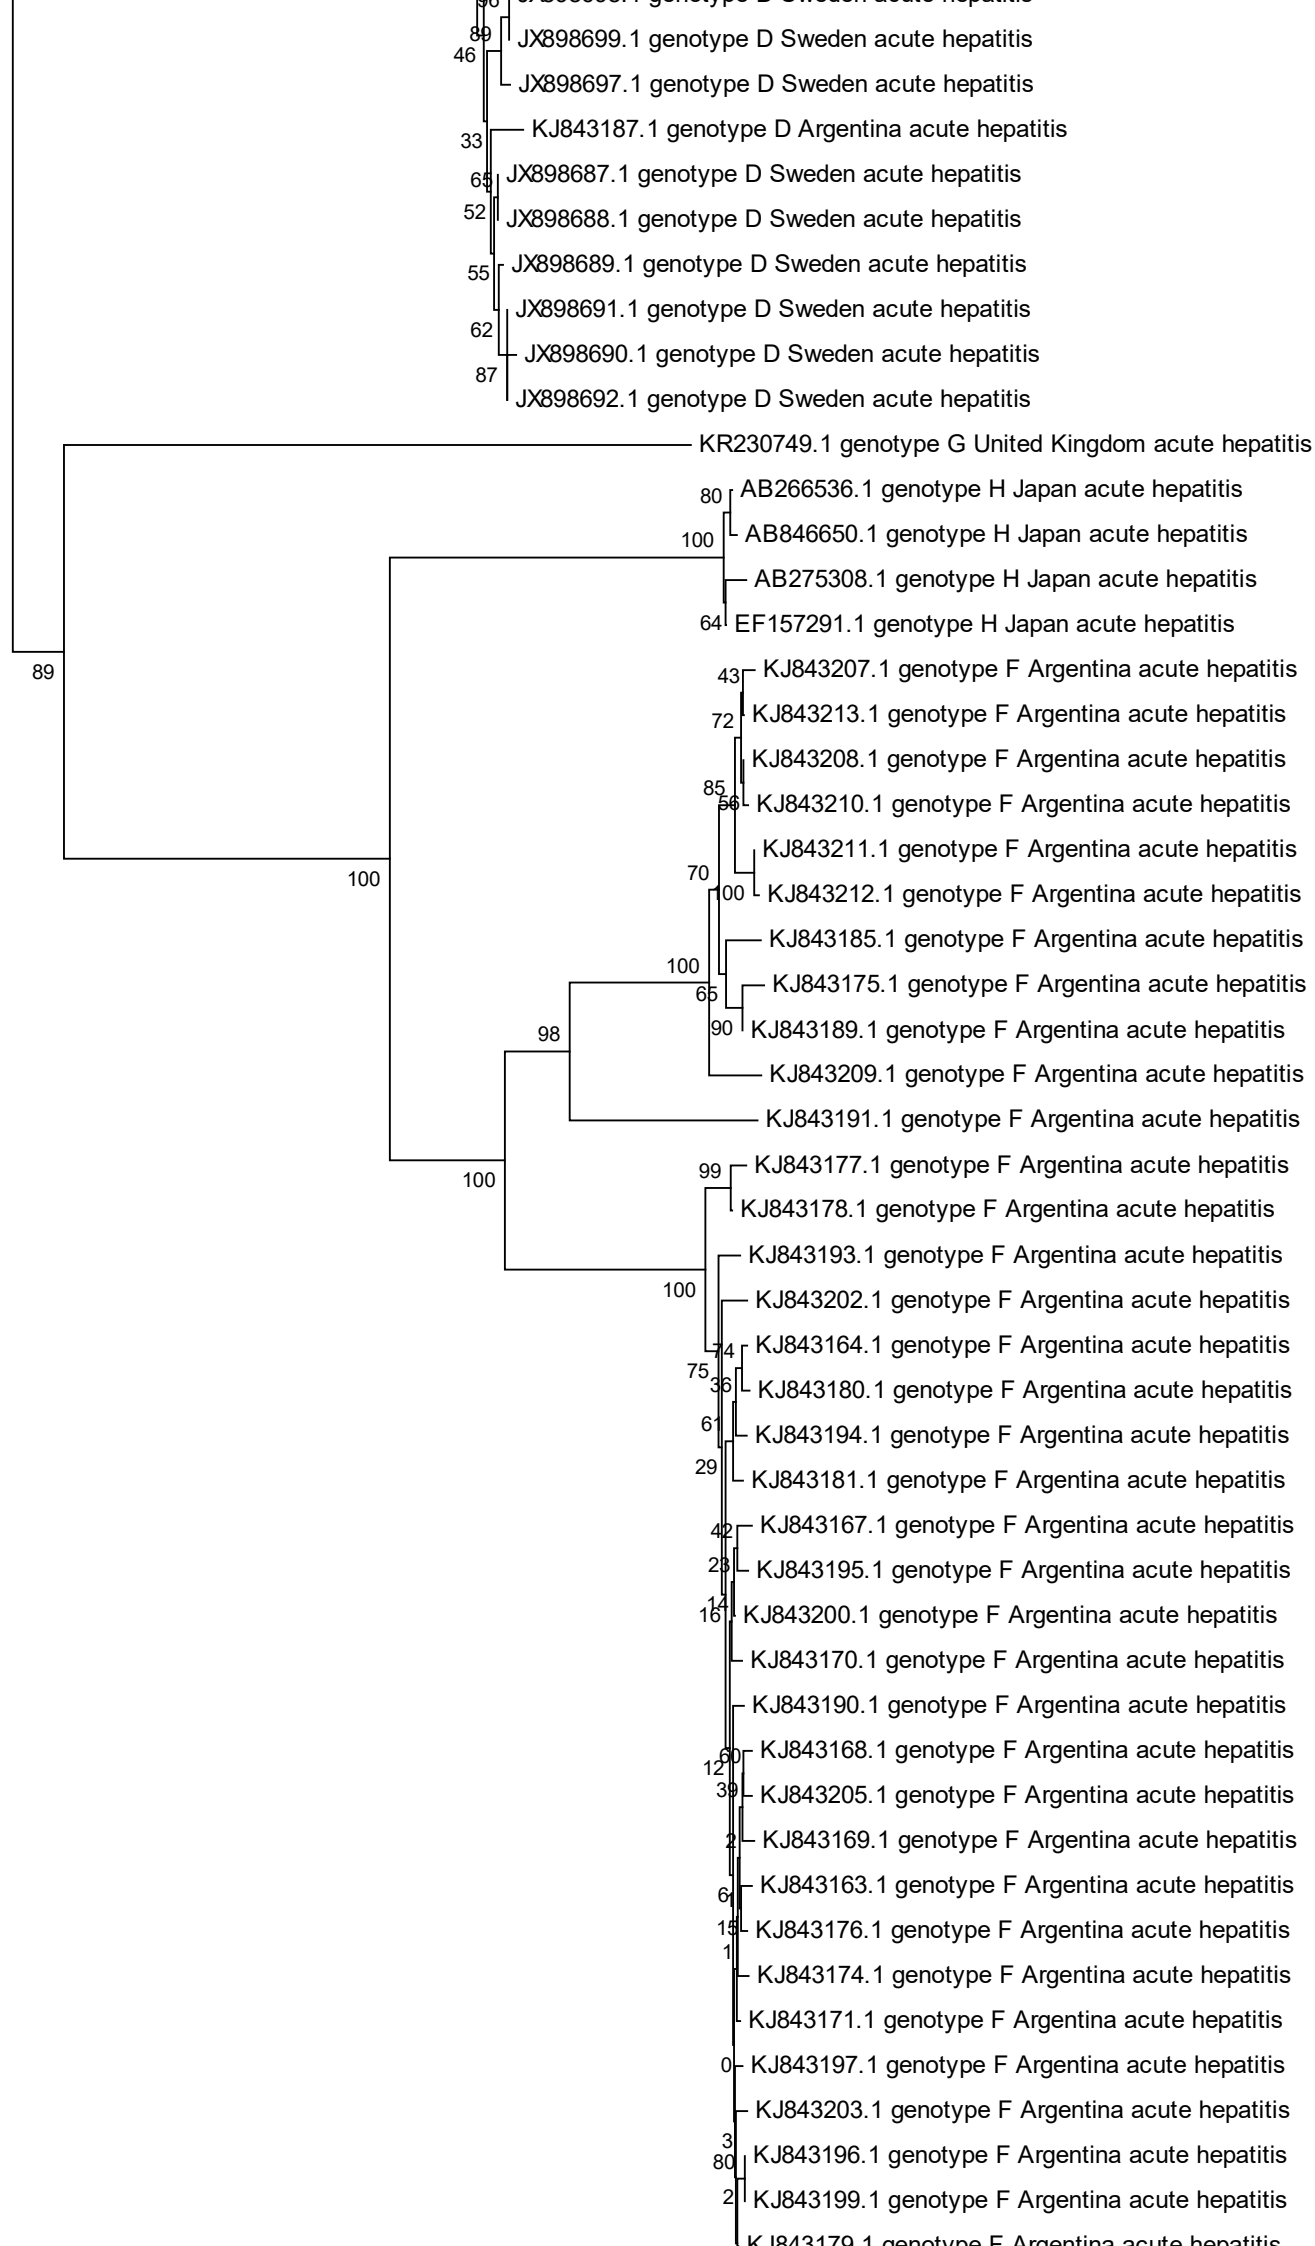

KJ843199.1 genotype F Argentina acute hepatitis  
1 KJ843179.1 genotype F Argentina acute hepatitis  
KJ843204.1 genotype F Argentina acute hepatitis  
4 KJ843206.1 genotype F Argentina acute hepatitis  
1 KJ843198.1 genotype F Argentina acute hepatitis  
13 KJ843201.1 genotype F Argentina acute hepatitis

0.0100
