# Supplementary material for: Novel Genetic Variants of Hepatitis B Virus in Fulminant Hepatitis
Source: Hindawi journal article supplement (doi:10.1155/2017/1231204), 2017-01-01
Supplement: f2 [file 1231204.f2.pdf]

| Accession Number | Genotype   | Country      | Hepatitis              |
|------------------|------------|--------------|------------------------|
| AF090838.1       | genotype A | France       | subfulminant hepatitis |
| AF297621.1       | genotype A | South Africa | fulminant hepatitis    |
| AF297622.1       | genotype A | South Africa | fulminant hepatitis    |
| AF297623.1       | genotype A | South Africa | fulminant hepatitis    |
| AF297624.1       | genotype A | South Africa | fulminant hepatitis    |
| AF297625.1       | genotype A | South Africa | fulminant hepatitis    |
| AY233284.1       | genotype A | South Africa | fulminant hepatitis    |
| LC051141.1       | genotype A | Japan        | fulminant hepatitis    |
| AB010290.1       | genotype B | Japan        | fulminant hepatitis    |
| AB031266.1       | genotype B | Vietnam      | fulminant hepatitis    |
| AB031267.1       | genotype B | Vietnam      | fulminant hepatitis    |
| AB100695.1       | genotype B | Vietnam      | fulminant hepatitis    |
| AB300370.1       | genotype B | Japan        | fulminant hepatitis    |
| AB300371.1       | genotype B | Japan        | fulminant hepatitis    |
| AB302942.1       | genotype B | Japan        | fulminant hepatitis    |
| AB302943.1       | genotype B | Japan        | fulminant hepatitis    |
| AB302944.1       | genotype B | Japan        | fulminant hepatitis    |
| AB302945.1       | genotype B | Japan        | fulminant hepatitis    |
| AB642091.1       | genotype B | Japan        | fulminant hepatitis    |
| AB642092.1       | genotype B | Japan        | fulminant hepatitis    |
| AB642093.1       | genotype B | Japan        | fulminant hepatitis    |
| AB642094.1       | genotype B | Japan        | fulminant hepatitis    |
| AB642098.1       | genotype B | Japan        | fulminant hepatitis    |
| AB931168.1       | genotype B | Japan        | fulminant hepatitis    |
| AF461360.1       | genotype B | China        | fulminant hepatitis    |
| AF461362.1       | genotype B | China        | fulminant hepatitis    |
| D50521.1         | genotype B | Japan        | fulminant hepatitis    |
| D50522.1         | genotype B | Japan        | fulminant hepatitis    |
| X97850.1         | genotype B | UK           | fulminant hepatitis    |
| X97851.1         | genotype B | UK           | fulminant hepatitis    |
| AB031265.1       | genotype C | Vietnam      | fulminant hepatitis    |
| AB049609.1       | genotype C | Japan        | fulminant hepatitis    |
| AB049610.1       | genotype C | Japan        | fulminant hepatitis    |
| AB205152.1       | genotype C | Japan        | fulminant hepatitis    |
| AB300368.1       | genotype C | Japan        | fulminant hepatitis    |
| AB300369.1       | genotype C | Japan        | fulminant hepatitis    |
| AB300372.1       | genotype C | Japan        | fulminant hepatitis    |
| AB300373.1       | genotype C | Japan        | fulminant hepatitis    |
| AB642095.1       | genotype C | Japan        | fulminant hepatitis    |
| AB642096.1       | genotype C | Japan        | fulminant hepatitis    |
| AB642097.1       | genotype C | Japan        | fulminant hepatitis    |
| AB642099.1       | genotype C | Japan        | fulminant hepatitis    |
| AB642100.1       | genotype C | Japan        | fulminant hepatitis    |
| AB931170.1       | genotype C | Japan        | fulminant hepatitis    |
| AF458664.1       | genotype C | China        | fulminant hepatitis    |
| AF458665.1       | genotype C | China        | fulminant hepatitis    |
| AF461357.1       | genotype C | China        | fulminant hepatitis    |
| AF461358.1       | genotype C | China        | fulminant hepatitis    |
| AF461361.1       | genotype C | China        | fulminant hepatitis    |

| Accession Number | Genotype   | Country      | Hepatitis           |
|------------------|------------|--------------|---------------------|
| AY066028.1       | genotype C | China        | fulminant hepatitis |
| AY306136.1       | genotype C | China        | fulminant hepatitis |
| GQ872211.1       | genotype C | South Korea  | fulminant hepatitis |
| AB078031.2       | genotype D | Japan        | fulminant hepatitis |
| AJ132335.1       | genotype D | Italy        | fulminant hepatitis |
| AJ627215.1       | genotype D | Spain        | fulminant hepatitis |
| AJ627218.1       | genotype D | Spain        | fulminant hepatitis |
| AY902768.1       | genotype D | USA          | fulminant hepatitis |
| AY902769.1       | genotype D | USA          | fulminant hepatitis |
| AY902770.1       | genotype D | USA          | fulminant hepatitis |
| AY902772.1       | genotype D | USA          | fulminant hepatitis |
| AY902774.1       | genotype D | USA          | fulminant hepatitis |
| AY902776.1       | genotype D | USA          | fulminant hepatitis |
| AY902777.1       | genotype D | USA          | fulminant hepatitis |
| L27106.1         | genotype D | Israel       | fulminant hepatitis |
| X80924.1         | genotype D | UK           | fulminant hepatitis |
| X97848.1         | genotype D | UK           | fulminant hepatitis |
| X97849.1         | genotype D | UK           | fulminant hepatitis |
| AB300366.1       | genotype A | Japan        | acute hepatitis     |
| AB300367.1       | genotype A | Japan        | acute hepatitis     |
| AB775198.1       | genotype A | Japan        | acute hepatitis     |
| AB775199.1       | genotype A | Japan        | acute hepatitis     |
| AB775200.1       | genotype A | Japan        | acute hepatitis     |
| AB775201.1       | genotype A | Japan        | acute hepatitis     |
| AB778116.1       | genotype A | Japan        | acute hepatitis     |
| AB937791.1       | genotype A | Japan        | acute hepatitis     |
| AB937792.1       | genotype A | Japan        | acute hepatitis     |
| AB937793.1       | genotype A | Japan        | acute hepatitis     |
| AB937794.1       | genotype A | Japan        | acute hepatitis     |
| AY233274.1       | genotype A | South Africa | acute hepatitis     |
| AY233279.1       | genotype A | South Africa | acute hepatitis     |
| AY233283.1       | genotype A | South Africa | acute hepatitis     |
| AY233287.1       | genotype A | South Africa | acute hepatitis     |
| EU859898.1       | genotype A | Belgium      | acute hepatitis     |
| EU859899.1       | genotype A | Belgium      | acute hepatitis     |
| EU859900.1       | genotype A | Belgium      | acute hepatitis     |
| EU859901.1       | genotype A | Belgium      | acute hepatitis     |
| EU859902.1       | genotype A | Belgium      | acute hepatitis     |
| EU859903.1       | genotype A | Belgium      | acute hepatitis     |
| EU859904.1       | genotype A | Belgium      | acute hepatitis     |
| EU859905.1       | genotype A | Belgium      | acute hepatitis     |
| EU859906.1       | genotype A | Belgium      | acute hepatitis     |
| EU859907.1       | genotype A | Belgium      | acute hepatitis     |
| EU859908.1       | genotype A | Belgium      | acute hepatitis     |
| EU859909.1       | genotype A | Belgium      | acute hepatitis     |
| EU859910.1       | genotype A | Belgium      | acute hepatitis     |
| EU859911.1       | genotype A | Belgium      | acute hepatitis     |
| EU859912.1       | genotype A | Belgium      | acute hepatitis     |
| EU859913.1       | genotype A | Belgium      | acute hepatitis     |

| Accession Number | Genotype   | Country   | Hepatitis       |
|------------------|------------|-----------|-----------------|
| EU859914.1       | genotype A | Belgium   | acute hepatitis |
| EU859915.1       | genotype A | Belgium   | acute hepatitis |
| EU859916.1       | genotype A | Belgium   | acute hepatitis |
| EU859917.1       | genotype A | Belgium   | acute hepatitis |
| EU859918.1       | genotype A | Belgium   | acute hepatitis |
| EU859919.1       | genotype A | Belgium   | acute hepatitis |
| EU859920.1       | genotype A | Belgium   | acute hepatitis |
| EU859921.1       | genotype A | Belgium   | acute hepatitis |
| EU859922.1       | genotype A | Belgium   | acute hepatitis |
| EU859923.1       | genotype A | Belgium   | acute hepatitis |
| EU859924.1       | genotype A | Belgium   | acute hepatitis |
| EU859925.1       | genotype A | Belgium   | acute hepatitis |
| EU859926.1       | genotype A | Belgium   | acute hepatitis |
| EU859927.1       | genotype A | Belgium   | acute hepatitis |
| EU859928.1       | genotype A | Belgium   | acute hepatitis |
| KC836877.1       | genotype A | Japan     | acute hepatitis |
| KC836878.1       | genotype A | Japan     | acute hepatitis |
| KC836879.1       | genotype A | Japan     | acute hepatitis |
| KC836880.1       | genotype A | Japan     | acute hepatitis |
| KC836881.1       | genotype A | Japan     | acute hepatitis |
| KJ843166.1       | genotype A | Argentina | acute hepatitis |
| KJ843172.1       | genotype A | Argentina | acute hepatitis |
| KJ843173.1       | genotype A | Argentina | acute hepatitis |
| KJ843182.1       | genotype A | Argentina | acute hepatitis |
| KJ843183.1       | genotype A | Argentina | acute hepatitis |
| KJ843184.1       | genotype A | Argentina | acute hepatitis |
| KJ843186.1       | genotype A | Argentina | acute hepatitis |
| KJ843188.1       | genotype A | Argentina | acute hepatitis |
| KJ843192.1       | genotype A | Argentina | acute hepatitis |
| KJ843214.1       | genotype A | Argentina | acute hepatitis |
| KJ843215.1       | genotype A | Argentina | acute hepatitis |
| KJ843216.1       | genotype A | Argentina | acute hepatitis |
| KJ843217.1       | genotype A | Argentina | acute hepatitis |
| KJ843218.1       | genotype A | Argentina | acute hepatitis |
| AB300364.1       | genotype B | Japan     | acute hepatitis |
| AB602818.1       | genotype B | Japan     | acute hepatitis |
| GQ377519.1       | genotype B | China     | acute hepatitis |
| GQ377525.1       | genotype B | China     | acute hepatitis |
| GQ377537.1       | genotype B | China     | acute hepatitis |
| GQ377542.1       | genotype B | China     | acute hepatitis |
| GQ377547.1       | genotype B | China     | acute hepatitis |
| GQ377550.1       | genotype B | China     | acute hepatitis |
| GQ377558.1       | genotype B | China     | acute hepatitis |
| GQ377561.1       | genotype B | China     | acute hepatitis |
| GQ377566.1       | genotype B | China     | acute hepatitis |
| GQ377567.1       | genotype B | China     | acute hepatitis |
| GQ377568.1       | genotype B | China     | acute hepatitis |
| GQ377569.1       | genotype B | China     | acute hepatitis |
| GQ377582.1       | genotype B | China     | acute hepatitis |

| Accession Number | Genotype   | Country   | Hepatitis       |
|------------------|------------|-----------|-----------------|
| GQ377587.1       | genotype B | China     | acute hepatitis |
| GQ377588.1       | genotype B | China     | acute hepatitis |
| GQ377595.1       | genotype B | China     | acute hepatitis |
| GQ377606.1       | genotype B | China     | acute hepatitis |
| GQ377610.1       | genotype B | China     | acute hepatitis |
| GQ377612.1       | genotype B | China     | acute hepatitis |
| GQ377622.1       | genotype B | China     | acute hepatitis |
| GQ377625.1       | genotype B | China     | acute hepatitis |
| GQ377629.1       | genotype B | China     | acute hepatitis |
| GQ377638.1       | genotype B | China     | acute hepatitis |
| GQ377639.1       | genotype B | China     | acute hepatitis |
| GQ377641.1       | genotype B | China     | acute hepatitis |
| GQ377643.1       | genotype B | China     | acute hepatitis |
| GQ377644.1       | genotype B | China     | acute hepatitis |
| KJ843165.1       | genotype B | Argentina | acute hepatitis |
| LC036263.1       | genotype B | Japan     | acute hepatitis |
| AB031262.1       | genotype C | Vietnam   | acute hepatitis |
| AB113879.1       | genotype C | Japan     | acute hepatitis |
| AB298720.1       | genotype C | Japan     | acute hepatitis |
| AB299858.1       | genotype C | Japan     | acute hepatitis |
| AB300359.1       | genotype C | Japan     | acute hepatitis |
| AB300360.1       | genotype C | Japan     | acute hepatitis |
| AB300361.1       | genotype C | Japan     | acute hepatitis |
| AB300362.1       | genotype C | Japan     | acute hepatitis |
| AB300363.1       | genotype C | Japan     | acute hepatitis |
| AB300365.1       | genotype C | Japan     | acute hepatitis |
| AB971715.1       | genotype C | Japan     | acute hepatitis |
| GQ377514.1       | genotype C | China     | acute hepatitis |
| GQ377515.1       | genotype C | China     | acute hepatitis |
| GQ377516.1       | genotype C | China     | acute hepatitis |
| GQ377517.1       | genotype C | China     | acute hepatitis |
| GQ377518.1       | genotype C | China     | acute hepatitis |
| GQ377520.1       | genotype C | China     | acute hepatitis |
| GQ377521.1       | genotype C | China     | acute hepatitis |
| GQ377522.1       | genotype C | China     | acute hepatitis |
| GQ377523.1       | genotype C | China     | acute hepatitis |
| GQ377524.1       | genotype C | China     | acute hepatitis |
| GQ377526.1       | genotype C | China     | acute hepatitis |
| GQ377527.1       | genotype C | China     | acute hepatitis |
| GQ377528.1       | genotype C | China     | acute hepatitis |
| GQ377529.1       | genotype C | China     | acute hepatitis |
| GQ377530.1       | genotype C | China     | acute hepatitis |
| GQ377531.1       | genotype C | China     | acute hepatitis |
| GQ377533.1       | genotype C | China     | acute hepatitis |
| GQ377534.1       | genotype C | China     | acute hepatitis |
| GQ377535.1       | genotype C | China     | acute hepatitis |
| GQ377536.1       | genotype C | China     | acute hepatitis |
| GQ377538.1       | genotype C | China     | acute hepatitis |
| GQ377539.1       | genotype C | China     | acute hepatitis |

| Accession Number | Genotype   | Country | Hepatitis       |
|------------------|------------|---------|-----------------|
| GQ377540.1       | genotype C | China   | acute hepatitis |
| GQ377541.1       | genotype C | China   | acute hepatitis |
| GQ377543.1       | genotype C | China   | acute hepatitis |
| GQ377544.1       | genotype C | China   | acute hepatitis |
| GQ377545.1       | genotype C | China   | acute hepatitis |
| GQ377546.1       | genotype C | China   | acute hepatitis |
| GQ377548.1       | genotype C | China   | acute hepatitis |
| GQ377549.1       | genotype C | China   | acute hepatitis |
| GQ377551.1       | genotype C | China   | acute hepatitis |
| GQ377552.1       | genotype C | China   | acute hepatitis |
| GQ377553.1       | genotype C | China   | acute hepatitis |
| GQ377554.1       | genotype C | China   | acute hepatitis |
| GQ377555.1       | genotype C | China   | acute hepatitis |
| GQ377556.1       | genotype C | China   | acute hepatitis |
| GQ377557.1       | genotype C | China   | acute hepatitis |
| GQ377559.1       | genotype C | China   | acute hepatitis |
| GQ377560.1       | genotype C | China   | acute hepatitis |
| GQ377562.1       | genotype C | China   | acute hepatitis |
| GQ377563.1       | genotype C | China   | acute hepatitis |
| GQ377564.1       | genotype C | China   | acute hepatitis |
| GQ377565.1       | genotype C | China   | acute hepatitis |
| GQ377570.1       | genotype C | China   | acute hepatitis |
| GQ377571.1       | genotype C | China   | acute hepatitis |
| GQ377572.1       | genotype C | China   | acute hepatitis |
| GQ377573.1       | genotype C | China   | acute hepatitis |
| GQ377574.1       | genotype C | China   | acute hepatitis |
| GQ377575.1       | genotype C | China   | acute hepatitis |
| GQ377576.1       | genotype C | China   | acute hepatitis |
| GQ377577.1       | genotype C | China   | acute hepatitis |
| GQ377578.1       | genotype C | China   | acute hepatitis |
| GQ377579.1       | genotype C | China   | acute hepatitis |
| GQ377580.1       | genotype C | China   | acute hepatitis |
| GQ377581.1       | genotype C | China   | acute hepatitis |
| GQ377583.1       | genotype C | China   | acute hepatitis |
| GQ377584.1       | genotype C | China   | acute hepatitis |
| GQ377585.1       | genotype C | China   | acute hepatitis |
| GQ377586.1       | genotype C | China   | acute hepatitis |
| GQ377590.1       | genotype C | China   | acute hepatitis |
| GQ377591.1       | genotype C | China   | acute hepatitis |
| GQ377592.1       | genotype C | China   | acute hepatitis |
| GQ377593.1       | genotype C | China   | acute hepatitis |
| GQ377594.1       | genotype C | China   | acute hepatitis |
| GQ377596.1       | genotype C | China   | acute hepatitis |
| GQ377597.1       | genotype C | China   | acute hepatitis |
| GQ377598.1       | genotype C | China   | acute hepatitis |
| GQ377599.1       | genotype C | China   | acute hepatitis |
| GQ377600.1       | genotype C | China   | acute hepatitis |
| GQ377601.1       | genotype C | China   | acute hepatitis |
| GQ377602.1       | genotype C | China   | acute hepatitis |

| Accession Number | Genotype   | Country      | Hepatitis       |
|------------------|------------|--------------|-----------------|
| GQ377603.1       | genotype C | China        | acute hepatitis |
| GQ377604.1       | genotype C | China        | acute hepatitis |
| GQ377605.1       | genotype C | China        | acute hepatitis |
| GQ377607.1       | genotype C | China        | acute hepatitis |
| GQ377608.1       | genotype C | China        | acute hepatitis |
| GQ377609.1       | genotype C | China        | acute hepatitis |
| GQ377611.1       | genotype C | China        | acute hepatitis |
| GQ377613.1       | genotype C | China        | acute hepatitis |
| GQ377614.1       | genotype C | China        | acute hepatitis |
| GQ377615.1       | genotype C | China        | acute hepatitis |
| GQ377616.1       | genotype C | China        | acute hepatitis |
| GQ377617.1       | genotype C | China        | acute hepatitis |
| GQ377618.1       | genotype C | China        | acute hepatitis |
| GQ377619.1       | genotype C | China        | acute hepatitis |
| GQ377620.1       | genotype C | China        | acute hepatitis |
| GQ377621.1       | genotype C | China        | acute hepatitis |
| GQ377623.1       | genotype C | China        | acute hepatitis |
| GQ377624.1       | genotype C | China        | acute hepatitis |
| GQ377626.1       | genotype C | China        | acute hepatitis |
| GQ377628.1       | genotype C | China        | acute hepatitis |
| GQ377630.1       | genotype C | China        | acute hepatitis |
| GQ377631.1       | genotype C | China        | acute hepatitis |
| GQ377632.1       | genotype C | China        | acute hepatitis |
| GQ377633.1       | genotype C | China        | acute hepatitis |
| GQ377634.1       | genotype C | China        | acute hepatitis |
| GQ377635.1       | genotype C | China        | acute hepatitis |
| GQ377636.1       | genotype C | China        | acute hepatitis |
| GQ377637.1       | genotype C | China        | acute hepatitis |
| GQ377640.1       | genotype C | China        | acute hepatitis |
| GQ377642.1       | genotype C | China        | acute hepatitis |
| AB078032.1       | genotype D | Japan        | acute hepatitis |
| AB116266.1       | genotype D | Japan        | acute hepatitis |
| AB120308.1       | genotype D | Japan        | acute hepatitis |
| AY233292.1       | genotype D | South Africa | acute hepatitis |
| AY902773.1       | genotype D | USA          | acute hepatitis |
| DQ991753.2       | genotype D | Ireland      | acute hepatitis |
| FJ349229.1       | genotype D | Belgium      | acute hepatitis |
| FJ349232.1       | genotype D | Belgium      | acute hepatitis |
| GQ377532.1       | genotype D | China        | acute hepatitis |
| GQ377589.1       | genotype D | China        | acute hepatitis |
| GQ377627.1       | genotype D | China        | acute hepatitis |
| JX898686.1       | genotype D | Sweden       | acute hepatitis |
| JX898687.1       | genotype D | Sweden       | acute hepatitis |
| JX898688.1       | genotype D | Sweden       | acute hepatitis |
| JX898689.1       | genotype D | Sweden       | acute hepatitis |
| JX898690.1       | genotype D | Sweden       | acute hepatitis |
| JX898691.1       | genotype D | Sweden       | acute hepatitis |
| JX898692.1       | genotype D | Sweden       | acute hepatitis |
| JX898693.1       | genotype D | Sweden       | acute hepatitis |

| Accession Number | Genotype   | Country   | Hepatitis       |
|------------------|------------|-----------|-----------------|
| JX898694.1       | genotype D | Sweden    | acute hepatitis |
| JX898695.1       | genotype D | Sweden    | acute hepatitis |
| JX898696.1       | genotype D | Sweden    | acute hepatitis |
| JX898697.1       | genotype D | Sweden    | acute hepatitis |
| JX898698.1       | genotype D | Sweden    | acute hepatitis |
| JX898699.1       | genotype D | Sweden    | acute hepatitis |
| KJ843187.1       | genotype D | Argentina | acute hepatitis |
| KJ843163.1       | genotype F | Argentina | acute hepatitis |
| KJ843164.1       | genotype F | Argentina | acute hepatitis |
| KJ843167.1       | genotype F | Argentina | acute hepatitis |
| KJ843168.1       | genotype F | Argentina | acute hepatitis |
| KJ843169.1       | genotype F | Argentina | acute hepatitis |
| KJ843170.1       | genotype F | Argentina | acute hepatitis |
| KJ843171.1       | genotype F | Argentina | acute hepatitis |
| KJ843174.1       | genotype F | Argentina | acute hepatitis |
| KJ843175.1       | genotype F | Argentina | acute hepatitis |
| KJ843176.1       | genotype F | Argentina | acute hepatitis |
| KJ843177.1       | genotype F | Argentina | acute hepatitis |
| KJ843178.1       | genotype F | Argentina | acute hepatitis |
| KJ843179.1       | genotype F | Argentina | acute hepatitis |
| KJ843180.1       | genotype F | Argentina | acute hepatitis |
| KJ843181.1       | genotype F | Argentina | acute hepatitis |
| KJ843185.1       | genotype F | Argentina | acute hepatitis |
| KJ843189.1       | genotype F | Argentina | acute hepatitis |
| KJ843190.1       | genotype F | Argentina | acute hepatitis |
| KJ843191.1       | genotype F | Argentina | acute hepatitis |
| KJ843193.1       | genotype F | Argentina | acute hepatitis |
| KJ843194.1       | genotype F | Argentina | acute hepatitis |
| KJ843195.1       | genotype F | Argentina | acute hepatitis |
| KJ843196.1       | genotype F | Argentina | acute hepatitis |
| KJ843197.1       | genotype F | Argentina | acute hepatitis |
| KJ843198.1       | genotype F | Argentina | acute hepatitis |
| KJ843199.1       | genotype F | Argentina | acute hepatitis |
| KJ843200.1       | genotype F | Argentina | acute hepatitis |
| KJ843201.1       | genotype F | Argentina | acute hepatitis |
| KJ843202.1       | genotype F | Argentina | acute hepatitis |
| KJ843203.1       | genotype F | Argentina | acute hepatitis |
| KJ843204.1       | genotype F | Argentina | acute hepatitis |
| KJ843205.1       | genotype F | Argentina | acute hepatitis |
| KJ843206.1       | genotype F | Argentina | acute hepatitis |
| KJ843207.1       | genotype F | Argentina | acute hepatitis |
| KJ843208.1       | genotype F | Argentina | acute hepatitis |
| KJ843209.1       | genotype F | Argentina | acute hepatitis |
| KJ843210.1       | genotype F | Argentina | acute hepatitis |
| KJ843211.1       | genotype F | Argentina | acute hepatitis |
| KJ843212.1       | genotype F | Argentina | acute hepatitis |
| KJ843213.1       | genotype F | Argentina | acute hepatitis |
| KR230749.1       | genotype G | UK        | acute hepatitis |
| AB266536.1       | genotype H | Japan     | acute hepatitis |

| <b>Accession Number</b> | <b>Genotype</b> | <b>Country</b> | <b>Hepatitis</b> |
|-------------------------|-----------------|----------------|------------------|
| AB275308.1              | genotype H      | Japan          | acute hepatitis  |
| AB846650.1              | genotype H      | Japan          | acute hepatitis  |
| EF157291.1              | genotype H      | Japan          | acute hepatitis  |
| AB231908.1              | genotype I      | Vietnam        | acute hepatitis  |
