# Supplementary material for: Novel Genetic Variants of Hepatitis B Virus in Fulminant Hepatitis
Source: Hindawi journal article supplement (doi:10.1155/2017/1231204), 2017-01-01
Supplement: f3 [file 1231204.f3.pdf]

**Suppl Table 2** Top 55 candidate nucleotides associated with fulminant hepatitis B

| Nucleotide | Fulminant, n = 67 | Acute, <sup>a</sup> n = 280 | % Accuracy <sup>b</sup> |
|------------|-------------------|-----------------------------|-------------------------|
|            | (%sensitivity)    | (%specificity)              |                         |
| A1896      | 41 (61.2)         | 24 (91.4)                   | 297 (85.6)              |
| C2129      | 17 (25.4)         | 1 (99.6)                    | 296 (85.3)              |
| A2345      | 17 (25.4)         | 3 (98.9)                    | 294 (84.7)              |
| G2003      | 16 (23.9)         | 4 (98.6)                    | 292 (84.1)              |
| C2441      | 20 (29.9)         | 9 (96.8)                    | 291 (83.9)              |
| G1981      | 10 (14.9)         | 0 (100.0)                   | 290 (83.6)              |
| T2755      | 11 (16.4)         | 1 (99.6)                    | 290 (83.6)              |
| A2136      | 13 (19.4)         | 3 (98.9)                    | 290 (83.6)              |
| B3106      | 10 (14.9)         | 1 (99.6)                    | 289 (83.3)              |
| C53        | 15 (22.4)         | 6 (97.9)                    | 289 (83.3)              |
| C1961      | 8 (11.9)          | 0 (100.0)                   | 288 (83.0)              |
| T720       | 9 (13.4)          | 1 (99.6)                    | 288 (83.0)              |
| G2430      | 9 (13.4)          | 1 (99.6)                    | 288 (83.0)              |
| G2431      | 9 (13.4)          | 1 (99.6)                    | 288 (83.0)              |
| D2303      | 10 (14.9)         | 2 (99.3)                    | 288 (83.0)              |
| C3013      | 11 (16.4)         | 3 (98.9)                    | 288 (83.0)              |
| S481       | 8 (11.9)          | 1 (99.6)                    | 287 (82.7)              |
| G1838      | 8 (11.9)          | 1 (99.6)                    | 287 (82.7)              |
| D1962      | 8 (11.9)          | 1 (99.6)                    | 287 (82.7)              |
| G273       | 9 (13.4)          | 2 (99.3)                    | 287 (82.7)              |
| M2546      | 10 (14.9)         | 3 (98.9)                    | 287 (82.7)              |
| C289       | 12 (17.9)         | 5 (98.2)                    | 287 (82.7)              |
| K2339      | 12 (17.9)         | 5 (98.2)                    | 287 (82.7)              |
| A2597      | 12 (17.9)         | 5 (98.2)                    | 287 (82.7)              |
| T1653      | 20 (29.9)         | 13 (95.4)                   | 287 (82.7)              |
| A1410      | 6 (9.0)           | 0 (100.0)                   | 286 (82.4)              |
| Y2092      | 6 (9.0)           | 0 (100.0)                   | 286 (82.4)              |

|       |           |           |            |
|-------|-----------|-----------|------------|
| Y2131 | 6 (9.0)   | 0 (100.0) | 286 (82.4) |
| A2222 | 6 (9.0)   | 0 (100.0) | 286 (82.4) |
| C280  | 7 (10.4)  | 1 (99.6)  | 286 (82.4) |
| C774  | 7 (10.4)  | 1 (99.6)  | 286 (82.4) |
| G2140 | 7 (10.4)  | 1 (99.6)  | 286 (82.4) |
| G2173 | 7 (10.4)  | 1 (99.6)  | 286 (82.4) |
| T2979 | 7 (10.4)  | 1 (99.6)  | 286 (82.4) |
| G300  | 8 (11.9)  | 2 (99.3)  | 286 (82.4) |
| W1739 | 8 (11.9)  | 2 (99.3)  | 286 (82.4) |
| G2340 | 9 (13.4)  | 3 (98.9)  | 286 (82.4) |
| R2522 | 9 (13.4)  | 3 (98.9)  | 286 (82.4) |
| S2708 | 9 (13.4)  | 3 (98.9)  | 286 (82.4) |
| C123  | 5 (7.5)   | 0 (100.0) | 285 (82.1) |
| C777  | 5 (7.5)   | 0 (100.0) | 285 (82.1) |
| A787  | 5 (7.5)   | 0 (100.0) | 285 (82.1) |
| T2013 | 5 (7.5)   | 0 (100.0) | 285 (82.1) |
| K2048 | 5 (7.5)   | 0 (100.0) | 285 (82.1) |
| A2512 | 5 (7.5)   | 0 (100.0) | 285 (82.1) |
| A3088 | 5 (7.5)   | 0 (100.0) | 285 (82.1) |
| C132  | 6 (9.0)   | 1 (99.6)  | 285 (82.1) |
| T343  | 6 (9.0)   | 1 (99.6)  | 285 (82.1) |
| W1677 | 6 (9.0)   | 1 (99.6)  | 285 (82.1) |
| A1739 | 7 (10.4)  | 2 (99.3)  | 285 (82.1) |
| C2489 | 7 (10.4)  | 2 (99.3)  | 285 (82.1) |
| G2150 | 8 (11.9)  | 3 (98.9)  | 285 (82.1) |
| C2151 | 8 (11.9)  | 3 (98.9)  | 285 (82.1) |
| A2410 | 8 (11.9)  | 3 (98.9)  | 285 (82.1) |
| A2636 | 10 (14.9) | 5 (98.2)  | 285 (82.1) |

---

SVM, support vector machine.

<sup>a</sup>Acute indicates acute non-fulminant hepatitis cases.

<sup>b</sup>% Accuracy = (67 x %sensitivity + 280 x %specificity)/(67 + 280).
