# Supplementary material for: Novel Genetic Variants of Hepatitis B Virus in Fulminant Hepatitis
Source: Hindawi journal article supplement (doi:10.1155/2017/1231204), 2017-01-01
Supplement: f4 [file 1231204.f4.pdf]

| Index  | Features | SNP1  | SNP2  | SNP3  | SNP4  | SNP5  | SNP6  | accuracy | sensitivity | specificity | PPV    | NPV    |
|--------|----------|-------|-------|-------|-------|-------|-------|----------|-------------|-------------|--------|--------|
| 143694 | 6.00     | C2129 | T720  | Y2131 | T2013 | K2048 | A2512 | 92.51%   | 64.18%      | 99.29%      | 95.56% | 92.05% |
| 144114 | 6.00     | C2129 | T720  | Y2092 | Y2131 | K2048 | A2512 | 92.51%   | 64.18%      | 99.29%      | 95.56% | 92.05% |
| 135493 | 6.00     | C2129 | Y2131 | T2979 | T2013 | K2048 | A2512 | 92.22%   | 62.69%      | 99.29%      | 95.45% | 91.75% |
| 135549 | 6.00     | C2129 | Y2131 | G2173 | T2013 | K2048 | A2512 | 92.22%   | 62.69%      | 99.29%      | 95.45% | 91.75% |
| 135633 | 6.00     | C2129 | Y2131 | C774  | T2013 | K2048 | A2512 | 92.22%   | 62.69%      | 99.29%      | 95.45% | 91.75% |
| 135753 | 6.00     | C2129 | Y2131 | C280  | T2013 | K2048 | A2512 | 92.22%   | 62.69%      | 99.29%      | 95.45% | 91.75% |
| 136449 | 6.00     | C2129 | Y2092 | Y2131 | T2979 | K2048 | A2512 | 92.22%   | 62.69%      | 99.29%      | 95.45% | 91.75% |
| 136477 | 6.00     | C2129 | Y2092 | Y2131 | G2173 | K2048 | A2512 | 92.22%   | 62.69%      | 99.29%      | 95.45% | 91.75% |
| 136513 | 6.00     | C2129 | Y2092 | Y2131 | C774  | K2048 | A2512 | 92.22%   | 62.69%      | 99.29%      | 95.45% | 91.75% |
| 136558 | 6.00     | C2129 | Y2092 | Y2131 | C280  | K2048 | A2512 | 92.22%   | 62.69%      | 99.29%      | 95.45% | 91.75% |
| 137164 | 6.00     | C2129 | A1410 | Y2131 | T2979 | K2048 | A2512 | 92.22%   | 62.69%      | 99.29%      | 95.45% | 91.75% |
| 137192 | 6.00     | C2129 | A1410 | Y2131 | G2173 | K2048 | A2512 | 92.22%   | 62.69%      | 99.29%      | 95.45% | 91.75% |
| 137228 | 6.00     | C2129 | A1410 | Y2131 | C774  | K2048 | A2512 | 92.22%   | 62.69%      | 99.29%      | 95.45% | 91.75% |
| 137273 | 6.00     | C2129 | A1410 | Y2131 | C280  | K2048 | A2512 | 92.22%   | 62.69%      | 99.29%      | 95.45% | 91.75% |
| 139494 | 6.00     | C2129 | G2431 | Y2131 | T2013 | K2048 | A2512 | 92.22%   | 62.69%      | 99.29%      | 95.45% | 91.75% |
| 139914 | 6.00     | C2129 | G2431 | Y2092 | Y2131 | K2048 | A2512 | 92.22%   | 62.69%      | 99.29%      | 95.45% | 91.75% |
| 140200 | 6.00     | C2129 | G2431 | A1410 | Y2131 | K2048 | A2512 | 92.22%   | 62.69%      | 99.29%      | 95.45% | 91.75% |
| 141314 | 6.00     | C2129 | G2430 | Y2131 | T2013 | K2048 | A2512 | 92.22%   | 62.69%      | 99.29%      | 95.45% | 91.75% |
| 141734 | 6.00     | C2129 | G2430 | Y2092 | Y2131 | K2048 | A2512 | 92.22%   | 62.69%      | 99.29%      | 95.45% | 91.75% |
| 142020 | 6.00     | C2129 | G2430 | A1410 | Y2131 | K2048 | A2512 | 92.22%   | 62.69%      | 99.29%      | 95.45% | 91.75% |
| 143677 | 6.00     | C2129 | T720  | Y2131 | K2048 | A2512 | W1677 | 92.22%   | 64.18%      | 98.93%      | 93.48% | 92.03% |
| 143687 | 6.00     | C2129 | T720  | Y2131 | T2013 | A2512 | W1677 | 92.22%   | 64.18%      | 98.93%      | 93.48% | 92.03% |
| 143715 | 6.00     | C2129 | T720  | Y2131 | C123  | T2013 | K2048 | 92.22%   | 62.69%      | 99.29%      | 95.45% | 91.75% |
| 144107 | 6.00     | C2129 | T720  | Y2092 | Y2131 | A2512 | W1677 | 92.22%   | 64.18%      | 98.93%      | 93.48% | 92.03% |
| 144126 | 6.00     | C2129 | T720  | Y2092 | Y2131 | C123  | K2048 | 92.22%   | 62.69%      | 99.29%      | 95.45% | 91.75% |
| 144400 | 6.00     | C2129 | T720  | A1410 | Y2131 | K2048 | A2512 | 92.22%   | 62.69%      | 99.29%      | 95.45% | 91.75% |
| 150630 | 6.00     | C2129 | T2755 | Y2131 | T2013 | K2048 | A2512 | 92.22%   | 62.69%      | 99.29%      | 95.45% | 91.75% |
| 151050 | 6.00     | C2129 | T2755 | Y2092 | Y2131 | K2048 | A2512 | 92.22%   | 62.69%      | 99.29%      | 95.45% | 91.75% |
| 151336 | 6.00     | C2129 | T2755 | A1410 | Y2131 | K2048 | A2512 | 92.22%   | 62.69%      | 99.29%      | 95.45% | 91.75% |
| 158040 | 6.00     | C2129 | G1981 | T720  | T2013 | K2048 | A2512 | 92.22%   | 62.69%      | 99.29%      | 95.45% | 91.75% |
| 158306 | 6.00     | C2129 | G1981 | T720  | Y2092 | K2048 | A2512 | 92.22%   | 62.69%      | 99.29%      | 95.45% | 91.75% |
| 135476 | 6.00     | C2129 | Y2131 | T2979 | K2048 | A2512 | W1677 | 91.93%   | 62.69%      | 98.93%      | 93.33% | 91.72% |

| Index  | Features | SNP1  | SNP2  | SNP3  | SNP4  | SNP5  | SNP6  | accuracy | sensitivity | specificity | PPV    | NPV    |
|--------|----------|-------|-------|-------|-------|-------|-------|----------|-------------|-------------|--------|--------|
| 135486 | 6.00     | C2129 | Y2131 | T2979 | T2013 | A2512 | W1677 | 91.93%   | 62.69%      | 98.93%      | 93.33% | 91.72% |
| 135514 | 6.00     | C2129 | Y2131 | T2979 | C123  | T2013 | K2048 | 91.93%   | 61.19%      | 99.29%      | 95.35% | 91.45% |
| 135532 | 6.00     | C2129 | Y2131 | G2173 | K2048 | A2512 | W1677 | 91.93%   | 62.69%      | 98.93%      | 93.33% | 91.72% |
| 135542 | 6.00     | C2129 | Y2131 | G2173 | T2013 | A2512 | W1677 | 91.93%   | 62.69%      | 98.93%      | 93.33% | 91.72% |
| 135570 | 6.00     | C2129 | Y2131 | G2173 | C123  | T2013 | K2048 | 91.93%   | 61.19%      | 99.29%      | 95.35% | 91.45% |
| 135616 | 6.00     | C2129 | Y2131 | C774  | K2048 | A2512 | W1677 | 91.93%   | 62.69%      | 98.93%      | 93.33% | 91.72% |
| 135626 | 6.00     | C2129 | Y2131 | C774  | T2013 | A2512 | W1677 | 91.93%   | 62.69%      | 98.93%      | 93.33% | 91.72% |
| 135654 | 6.00     | C2129 | Y2131 | C774  | C123  | T2013 | K2048 | 91.93%   | 61.19%      | 99.29%      | 95.35% | 91.45% |
| 135736 | 6.00     | C2129 | Y2131 | C280  | K2048 | A2512 | W1677 | 91.93%   | 62.69%      | 98.93%      | 93.33% | 91.72% |
| 135746 | 6.00     | C2129 | Y2131 | C280  | T2013 | A2512 | W1677 | 91.93%   | 62.69%      | 98.93%      | 93.33% | 91.72% |
| 135774 | 6.00     | C2129 | Y2131 | C280  | C123  | T2013 | K2048 | 91.93%   | 61.19%      | 99.29%      | 95.35% | 91.45% |
| 136442 | 6.00     | C2129 | Y2092 | Y2131 | T2979 | A2512 | W1677 | 91.93%   | 62.69%      | 98.93%      | 93.33% | 91.72% |
| 136461 | 6.00     | C2129 | Y2092 | Y2131 | T2979 | C123  | K2048 | 91.93%   | 61.19%      | 99.29%      | 95.35% | 91.45% |
| 136470 | 6.00     | C2129 | Y2092 | Y2131 | G2173 | A2512 | W1677 | 91.93%   | 62.69%      | 98.93%      | 93.33% | 91.72% |
| 136489 | 6.00     | C2129 | Y2092 | Y2131 | G2173 | C123  | K2048 | 91.93%   | 61.19%      | 99.29%      | 95.35% | 91.45% |
| 136506 | 6.00     | C2129 | Y2092 | Y2131 | C774  | A2512 | W1677 | 91.93%   | 62.69%      | 98.93%      | 93.33% | 91.72% |
| 136525 | 6.00     | C2129 | Y2092 | Y2131 | C774  | C123  | K2048 | 91.93%   | 61.19%      | 99.29%      | 95.35% | 91.45% |
| 136551 | 6.00     | C2129 | Y2092 | Y2131 | C280  | A2512 | W1677 | 91.93%   | 62.69%      | 98.93%      | 93.33% | 91.72% |
| 136570 | 6.00     | C2129 | Y2092 | Y2131 | C280  | C123  | K2048 | 91.93%   | 61.19%      | 99.29%      | 95.35% | 91.45% |
| 137157 | 6.00     | C2129 | A1410 | Y2131 | T2979 | A2512 | W1677 | 91.93%   | 62.69%      | 98.93%      | 93.33% | 91.72% |
| 137176 | 6.00     | C2129 | A1410 | Y2131 | T2979 | C123  | K2048 | 91.93%   | 61.19%      | 99.29%      | 95.35% | 91.45% |
| 137185 | 6.00     | C2129 | A1410 | Y2131 | G2173 | A2512 | W1677 | 91.93%   | 62.69%      | 98.93%      | 93.33% | 91.72% |
| 137204 | 6.00     | C2129 | A1410 | Y2131 | G2173 | C123  | K2048 | 91.93%   | 61.19%      | 99.29%      | 95.35% | 91.45% |
| 137221 | 6.00     | C2129 | A1410 | Y2131 | C774  | A2512 | W1677 | 91.93%   | 62.69%      | 98.93%      | 93.33% | 91.72% |
| 137240 | 6.00     | C2129 | A1410 | Y2131 | C774  | C123  | K2048 | 91.93%   | 61.19%      | 99.29%      | 95.35% | 91.45% |
| 137266 | 6.00     | C2129 | A1410 | Y2131 | C280  | A2512 | W1677 | 91.93%   | 62.69%      | 98.93%      | 93.33% | 91.72% |
| 137285 | 6.00     | C2129 | A1410 | Y2131 | C280  | C123  | K2048 | 91.93%   | 61.19%      | 99.29%      | 95.35% | 91.45% |
| 138122 | 6.00     | C2129 | D2303 | Y2131 | T2013 | A2512 | W1677 | 91.93%   | 64.18%      | 98.57%      | 91.49% | 92.00% |
| 138129 | 6.00     | C2129 | D2303 | Y2131 | T2013 | K2048 | A2512 | 91.93%   | 62.69%      | 98.93%      | 93.33% | 91.72% |
| 138542 | 6.00     | C2129 | D2303 | Y2092 | Y2131 | A2512 | W1677 | 91.93%   | 64.18%      | 98.57%      | 91.49% | 92.00% |
| 138549 | 6.00     | C2129 | D2303 | Y2092 | Y2131 | K2048 | A2512 | 91.93%   | 62.69%      | 98.93%      | 93.33% | 91.72% |
| 138828 | 6.00     | C2129 | D2303 | A1410 | Y2131 | A2512 | W1677 | 91.93%   | 64.18%      | 98.57%      | 91.49% | 92.00% |
