# Supplementary material for: Novel Genetic Variants of Hepatitis B Virus in Fulminant Hepatitis
Source: Hindawi journal article supplement (doi:10.1155/2017/1231204), 2017-01-01
Supplement: f5 [file 1231204.f5.pdf]

| SNP                                                    | C2129 | T720 | Y2131 | T2013 | K2048 | A2512 | Total number of variants |
|--------------------------------------------------------|-------|------|-------|-------|-------|-------|--------------------------|
| AB010290.1_genotype B_Japan_fulminant hepatitis        | 1     | 0    | 0     | 0     | 0     | 0     | 1                        |
| AB031265.1_genotype C_Vietnam_fulminant hepatitis      | 0     | 0    | 0     | 0     | 0     | 0     | 0                        |
| AB031266.1_genotype B_Vietnam_fulminant hepatitis      | 0     | 0    | 0     | 0     | 0     | 1     | 1                        |
| AB031267.1_genotype B_Vietnam_fulminant hepatitis      | 0     | 0    | 0     | 0     | 0     | 1     | 1                        |
| AB049609.1_genotype C_Japan_fulminant hepatitis        | 0     | 0    | 0     | 0     | 0     | 0     | 0                        |
| AB049610.1_genotype C_Japan_fulminant hepatitis        | 0     | 0    | 1     | 0     | 0     | 0     | 1                        |
| AB078031.2_genotype D_Japan_fulminant hepatitis        | 0     | 0    | 0     | 0     | 0     | 0     | 0                        |
| AB100695.1_genotype B_Vietnam_fulminant hepatitis      | 0     | 0    | 0     | 0     | 0     | 1     | 1                        |
| AB205152.1_genotype C_Japan_fulminant hepatitis        | 0     | 0    | 0     | 0     | 1     | 0     | 1                        |
| AB300368.1_genotype C_Japan_fulminant hepatitis        | 0     | 0    | 0     | 0     | 0     | 0     | 0                        |
| AB300369.1_genotype C_Japan_fulminant hepatitis        | 1     | 1    | 0     | 0     | 0     | 0     | 2                        |
| AB300370.1_genotype B_Japan_fulminant hepatitis        | 1     | 0    | 0     | 0     | 0     | 0     | 1                        |
| AB300371.1_genotype B_Japan_fulminant hepatitis        | 1     | 0    | 0     | 0     | 0     | 0     | 1                        |
| AB300372.1_genotype C_Japan_fulminant hepatitis        | 0     | 0    | 0     | 0     | 0     | 0     | 0                        |
| AB300373.1_genotype C_Japan_fulminant hepatitis        | 0     | 1    | 0     | 0     | 0     | 0     | 1                        |
| AB302942.1_genotype B_Japan_fulminant hepatitis        | 1     | 0    | 0     | 0     | 0     | 0     | 1                        |
| AB302943.1_genotype B_Japan_fulminant hepatitis        | 1     | 0    | 0     | 0     | 0     | 0     | 1                        |
| AB302944.1_genotype B_Japan_fulminant hepatitis        | 1     | 0    | 0     | 0     | 0     | 0     | 1                        |
| AB302945.1_genotype B_Japan_fulminant hepatitis        | 1     | 0    | 0     | 0     | 0     | 0     | 1                        |
| AB642091.1_genotype B_Japan_fulminant hepatitis        | 0     | 0    | 1     | 1     | 0     | 0     | 2                        |
| AB642092.1_genotype B_Japan_fulminant hepatitis        | 0     | 0    | 1     | 0     | 0     | 0     | 1                        |
| AB642093.1_genotype B_Japan_fulminant hepatitis        | 0     | 0    | 1     | 0     | 0     | 0     | 1                        |
| AB642094.1_genotype B_Japan_fulminant hepatitis        | 0     | 0    | 0     | 0     | 0     | 0     | 0                        |
| AB642095.1_genotype C_Japan_fulminant hepatitis        | 0     | 0    | 0     | 0     | 1     | 0     | 1                        |
| AB642096.1_genotype C_Japan_fulminant hepatitis        | 0     | 0    | 0     | 0     | 1     | 0     | 1                        |
| AB642097.1_genotype C_Japan_fulminant hepatitis        | 0     | 0    | 1     | 0     | 1     | 0     | 2                        |
| AB642098.1_genotype B_Japan_fulminant hepatitis        | 1     | 0    | 0     | 0     | 0     | 0     | 1                        |
| AB642099.1_genotype C_Japan_fulminant hepatitis        | 0     | 0    | 0     | 0     | 0     | 0     | 0                        |
| AB642100.1_genotype C_Japan_fulminant hepatitis        | 0     | 0    | 0     | 0     | 0     | 0     | 0                        |
| AF090838.1_genotype A_France_subfulminant hepatitis    | 0     | 0    | 0     | 1     | 0     | 0     | 1                        |
| AF297621.1_genotype A_South Africa_fulminant hepatitis | 0     | 0    | 0     | 0     | 0     | 1     | 1                        |
| AF297622.1_genotype A_South Africa_fulminant hepatitis | 1     | 0    | 0     | 0     | 0     | 0     | 1                        |

| SNP                                                    | C2129 | T720 | Y2131 | T2013 | K2048 | A2512 | Total number of variants |
|--------------------------------------------------------|-------|------|-------|-------|-------|-------|--------------------------|
| AF297623.1_genotype A_South Africa_fulminant hepatitis | 0     | 0    | 1     | 0     | 0     | 0     | 1                        |
| AF297624.1_genotype A_South Africa_fulminant hepatitis | 0     | 0    | 0     | 0     | 0     | 0     | 0                        |
| AF297625.1_genotype A_South Africa_fulminant hepatitis | 0     | 0    | 0     | 0     | 0     | 0     | 0                        |
| AF458664.1_genotype C_China_fulminant hepatitis        | 0     | 0    | 0     | 0     | 0     | 0     | 0                        |
| AF458665.1_genotype C_China_fulminant hepatitis        | 0     | 0    | 0     | 0     | 0     | 1     | 1                        |
| AF461357.1_genotype C_China_fulminant hepatitis        | 0     | 0    | 0     | 0     | 0     | 0     | 0                        |
| AF461358.1_genotype C_China_fulminant hepatitis        | 0     | 0    | 0     | 0     | 0     | 0     | 0                        |
| AF461360.1_genotype B_China_fulminant hepatitis        | 0     | 0    | 0     | 0     | 0     | 0     | 0                        |
| AF461361.1_genotype C_China_fulminant hepatitis        | 0     | 0    | 0     | 0     | 0     | 0     | 0                        |
| AF461362.1_genotype B_China_fulminant hepatitis        | 0     | 0    | 0     | 0     | 0     | 0     | 0                        |
| AJ132335.1_genotype D_Italy_fulminant hepatitis        | 0     | 0    | 0     | 0     | 0     | 0     | 0                        |
| AJ627215.1_genotype D_Spain_fulminant hepatitis        | 0     | 0    | 0     | 1     | 0     | 0     | 1                        |
| AY066028.1_genotype C_China_fulminant hepatitis        | 0     | 0    | 0     | 0     | 0     | 0     | 0                        |
| AY233284.1_genotype A_South Africa_fulminant hepatitis | 0     | 0    | 0     | 0     | 0     | 0     | 0                        |
| AY306136.1_genotype C_China_fulminant hepatitis        | 0     | 0    | 0     | 0     | 0     | 0     | 0                        |
| AY902768.1_genotype D_USA_fulminant hepatitis          | 0     | 1    | 0     | 0     | 0     | 0     | 1                        |
| AY902769.1_genotype D_USA_fulminant hepatitis          | 0     | 1    | 0     | 0     | 0     | 0     | 1                        |
| AY902770.1_genotype D_USA_fulminant hepatitis          | 0     | 1    | 0     | 0     | 0     | 0     | 1                        |
| AY902772.1_genotype D_USA_fulminant hepatitis          | 0     | 1    | 0     | 0     | 0     | 0     | 1                        |
| AY902774.1_genotype D_USA_fulminant hepatitis          | 0     | 1    | 0     | 0     | 0     | 0     | 1                        |
| AY902776.1_genotype D_USA_fulminant hepatitis          | 0     | 1    | 0     | 0     | 0     | 0     | 1                        |
| AY902777.1_genotype D_USA_fulminant hepatitis          | 0     | 1    | 0     | 0     | 0     | 0     | 1                        |
| D50521.1_genotype B_Japan_fulminant hepatitis          | 1     | 0    | 0     | 0     | 0     | 0     | 1                        |
| D50522.1_genotype B_Japan_fulminant hepatitis          | 1     | 0    | 0     | 0     | 0     | 0     | 1                        |
| GQ872211.1_genotype C_South Korea_fulminant hepatitis  | 0     | 0    | 0     | 0     | 0     | 0     | 0                        |
| L27106.1_genotype D_Israel_fulminant hepatitis         | 0     | 0    | 0     | 1     | 0     | 0     | 1                        |
| X80924.1_genotype D_UK_fulminant hepatitis             | 1     | 0    | 0     | 0     | 0     | 0     | 1                        |
| X97848.1_genotype D_UK_fulminant hepatitis             | 1     | 0    | 0     | 0     | 0     | 0     | 1                        |
| X97849.1_genotype D_UK_fulminant hepatitis             | 1     | 0    | 0     | 0     | 0     | 0     | 1                        |
| X97850.1_genotype B_UK_fulminant hepatitis             | 0     | 0    | 0     | 0     | 0     | 0     | 0                        |
| X97851.1_genotype B_UK_fulminant hepatitis             | 1     | 0    | 0     | 0     | 0     | 0     | 1                        |
| AJ627218.1_genotype D_Spain_fulminant hepatitis        | 0     | 0    | 0     | 1     | 0     | 0     | 1                        |

| SNP                                                | C2129 | T720 | Y2131 | T2013 | K2048 | A2512 | Total number of variants |
|----------------------------------------------------|-------|------|-------|-------|-------|-------|--------------------------|
| LC051141.1_genotype A_Japan_fulminant hepatitis    | 0     | 0    | 0     | 0     | 0     | 0     | 0                        |
| AB931168.1_genotype B_Japan_fulminant hepatitis    | 1     | 0    | 0     | 0     | 1     | 0     | 2                        |
| AB931170.1_genotype C_Japan_fulminant hepatitis    | 0     | 0    | 0     | 0     | 0     | 0     | 0                        |
| AB031262.1_genotype C_Vietnam_acute hepatitis      | 0     | 0    | 0     | 0     | 0     | 0     | 0                        |
| AB078032.1_genotype D_Japan_acute hepatitis        | 0     | 0    | 0     | 0     | 0     | 0     | 0                        |
| AB113879.1_genotype C_Japan_acute hepatitis        | 0     | 0    | 0     | 0     | 0     | 0     | 0                        |
| AB116266.1_genotype D_Japan_acute hepatitis        | 0     | 0    | 0     | 0     | 0     | 0     | 0                        |
| AB120308.1_genotype D_Japan_acute hepatitis        | 0     | 0    | 0     | 0     | 0     | 0     | 0                        |
| AB231908.1_genotype I_Vietnam_acute hepatitis      | 0     | 0    | 0     | 0     | 0     | 0     | 0                        |
| AB266536.1_genotype H_Japan_acute hepatitis        | 0     | 0    | 0     | 0     | 0     | 0     | 0                        |
| AB275308.1_genotype H_Japan_acute hepatitis        | 0     | 0    | 0     | 0     | 0     | 0     | 0                        |
| AB298720.1_genotype C_Japan_acute hepatitis        | 0     | 0    | 0     | 0     | 0     | 0     | 0                        |
| AB299858.1_genotype C_Japan_acute hepatitis        | 0     | 0    | 0     | 0     | 0     | 0     | 0                        |
| AB300359.1_genotype C_Japan_acute hepatitis        | 0     | 0    | 0     | 0     | 0     | 0     | 0                        |
| AB300360.1_genotype C_Japan_acute hepatitis        | 0     | 0    | 0     | 0     | 0     | 0     | 0                        |
| AB300361.1_genotype C_Japan_acute hepatitis        | 0     | 0    | 0     | 0     | 0     | 0     | 0                        |
| AB300362.1_genotype C_Japan_acute hepatitis        | 0     | 0    | 0     | 0     | 0     | 0     | 0                        |
| AB300363.1_genotype C_Japan_acute hepatitis        | 0     | 0    | 0     | 0     | 0     | 0     | 0                        |
| AB300364.1_genotype B_Japan_acute hepatitis        | 0     | 0    | 0     | 0     | 0     | 0     | 0                        |
| AB300365.1_genotype C_Japan_acute hepatitis        | 0     | 0    | 0     | 0     | 0     | 0     | 0                        |
| AB300366.1_genotype A_Japan_acute hepatitis        | 0     | 0    | 0     | 0     | 0     | 0     | 0                        |
| AB300367.1_genotype A_Japan_acute hepatitis        | 0     | 0    | 0     | 0     | 0     | 0     | 0                        |
| AB602818.1_genotype B_Japan_acute hepatitis        | 0     | 0    | 0     | 0     | 0     | 0     | 0                        |
| AY233274.1_genotype A_South Africa_acute hepatitis | 0     | 0    | 0     | 0     | 0     | 0     | 0                        |
| AY233279.1_genotype A_South Africa_acute hepatitis | 0     | 0    | 0     | 0     | 0     | 0     | 0                        |
| AY233283.1_genotype A_South Africa_acute hepatitis | 0     | 0    | 0     | 0     | 0     | 0     | 0                        |
| AY233287.1_genotype A_South Africa_acute hepatitis | 0     | 0    | 0     | 0     | 0     | 0     | 0                        |
| AY233292.1_genotype D_South Africa_acute hepatitis | 0     | 0    | 0     | 0     | 0     | 0     | 0                        |
| AY902773.1_genotype D_USA_acute hepatitis          | 0     | 1    | 0     | 0     | 0     | 0     | 1                        |
| DQ991753.2_genotype D_Ireland_acute hepatitis      | 0     | 0    | 0     | 0     | 0     | 0     | 0                        |
| EF157291.1_genotype H_Japan_acute hepatitis        | 0     | 0    | 0     | 0     | 0     | 0     | 0                        |
| EU859898.1_genotype A_Belgium_acute hepatitis      | 0     | 0    | 0     | 0     | 0     | 0     | 0                        |

| SNP                                           | C2129 | T720 | Y2131 | T2013 | K2048 | A2512 | Total number of variants |
|-----------------------------------------------|-------|------|-------|-------|-------|-------|--------------------------|
| EU859899.1_genotype A_Belgium_acute hepatitis | 0     | 0    | 0     | 0     | 0     | 0     | 0                        |
| EU859900.1_genotype A_Belgium_acute hepatitis | 0     | 0    | 0     | 0     | 0     | 0     | 0                        |
| EU859901.1_genotype A_Belgium_acute hepatitis | 0     | 0    | 0     | 0     | 0     | 0     | 0                        |
| EU859902.1_genotype A_Belgium_acute hepatitis | 0     | 0    | 0     | 0     | 0     | 0     | 0                        |
| EU859903.1_genotype A_Belgium_acute hepatitis | 0     | 0    | 0     | 0     | 0     | 0     | 0                        |
| EU859904.1_genotype A_Belgium_acute hepatitis | 0     | 0    | 0     | 0     | 0     | 0     | 0                        |
| EU859905.1_genotype A_Belgium_acute hepatitis | 0     | 0    | 0     | 0     | 0     | 0     | 0                        |
| EU859906.1_genotype A_Belgium_acute hepatitis | 0     | 0    | 0     | 0     | 0     | 0     | 0                        |
| EU859907.1_genotype A_Belgium_acute hepatitis | 0     | 0    | 0     | 0     | 0     | 0     | 0                        |
| EU859908.1_genotype A_Belgium_acute hepatitis | 0     | 0    | 0     | 0     | 0     | 0     | 0                        |
| EU859909.1_genotype A_Belgium_acute hepatitis | 0     | 0    | 0     | 0     | 0     | 0     | 0                        |
| EU859910.1_genotype A_Belgium_acute hepatitis | 0     | 0    | 0     | 0     | 0     | 0     | 0                        |
| EU859911.1_genotype A_Belgium_acute hepatitis | 0     | 0    | 0     | 0     | 0     | 0     | 0                        |
| EU859912.1_genotype A_Belgium_acute hepatitis | 0     | 0    | 0     | 0     | 0     | 0     | 0                        |
| EU859913.1_genotype A_Belgium_acute hepatitis | 0     | 0    | 0     | 0     | 0     | 0     | 0                        |
| EU859914.1_genotype A_Belgium_acute hepatitis | 0     | 0    | 0     | 0     | 0     | 0     | 0                        |
| EU859915.1_genotype A_Belgium_acute hepatitis | 0     | 0    | 0     | 0     | 0     | 0     | 0                        |
| EU859916.1_genotype A_Belgium_acute hepatitis | 0     | 0    | 0     | 0     | 0     | 0     | 0                        |
| EU859917.1_genotype A_Belgium_acute hepatitis | 0     | 0    | 0     | 0     | 0     | 0     | 0                        |
| EU859918.1_genotype A_Belgium_acute hepatitis | 0     | 0    | 0     | 0     | 0     | 0     | 0                        |
| EU859919.1_genotype A_Belgium_acute hepatitis | 0     | 0    | 0     | 0     | 0     | 0     | 0                        |
| EU859920.1_genotype A_Belgium_acute hepatitis | 0     | 0    | 0     | 0     | 0     | 0     | 0                        |
| EU859921.1_genotype A_Belgium_acute hepatitis | 0     | 0    | 0     | 0     | 0     | 0     | 0                        |
| EU859922.1_genotype A_Belgium_acute hepatitis | 0     | 0    | 0     | 0     | 0     | 0     | 0                        |
| EU859923.1_genotype A_Belgium_acute hepatitis | 0     | 0    | 0     | 0     | 0     | 0     | 0                        |
| EU859924.1_genotype A_Belgium_acute hepatitis | 0     | 0    | 0     | 0     | 0     | 0     | 0                        |
| EU859925.1_genotype A_Belgium_acute hepatitis | 0     | 0    | 0     | 0     | 0     | 0     | 0                        |
| EU859926.1_genotype A_Belgium_acute hepatitis | 0     | 0    | 0     | 0     | 0     | 0     | 0                        |
| EU859927.1_genotype A_Belgium_acute hepatitis | 0     | 0    | 0     | 0     | 0     | 0     | 0                        |
| EU859928.1_genotype A_Belgium_acute hepatitis | 0     | 0    | 0     | 0     | 0     | 0     | 0                        |
| FJ349229.1_genotype D_Belgium_acute hepatitis | 0     | 0    | 0     | 0     | 0     | 0     | 0                        |
| FJ349232.1_genotype D_Belgium_acute hepatitis | 0     | 0    | 0     | 0     | 0     | 0     | 0                        |

| SNP                                         | C2129 | T720 | Y2131 | T2013 | K2048 | A2512 | Total number of variants |
|---------------------------------------------|-------|------|-------|-------|-------|-------|--------------------------|
| GQ377514.1_genotype C_China_acute hepatitis | 0     | 0    | 0     | 0     | 0     | 0     | 0                        |
| GQ377515.1_genotype C_China_acute hepatitis | 0     | 0    | 0     | 0     | 0     | 0     | 0                        |
| GQ377516.1_genotype C_China_acute hepatitis | 0     | 0    | 0     | 0     | 0     | 0     | 0                        |
| GQ377517.1_genotype C_China_acute hepatitis | 0     | 0    | 0     | 0     | 0     | 0     | 0                        |
| GQ377518.1_genotype C_China_acute hepatitis | 0     | 0    | 0     | 0     | 0     | 0     | 0                        |
| GQ377519.1_genotype B_China_acute hepatitis | 0     | 0    | 0     | 0     | 0     | 0     | 0                        |
| GQ377520.1_genotype C_China_acute hepatitis | 0     | 0    | 0     | 0     | 0     | 0     | 0                        |
| GQ377521.1_genotype C_China_acute hepatitis | 0     | 0    | 0     | 0     | 0     | 0     | 0                        |
| GQ377522.1_genotype C_China_acute hepatitis | 0     | 0    | 0     | 0     | 0     | 0     | 0                        |
| GQ377523.1_genotype C_China_acute hepatitis | 0     | 0    | 0     | 0     | 0     | 0     | 0                        |
| GQ377524.1_genotype C_China_acute hepatitis | 0     | 0    | 0     | 0     | 0     | 0     | 0                        |
| GQ377525.1_genotype B_China_acute hepatitis | 0     | 0    | 0     | 0     | 0     | 0     | 0                        |
| GQ377526.1_genotype C_China_acute hepatitis | 0     | 0    | 0     | 0     | 0     | 0     | 0                        |
| GQ377527.1_genotype C_China_acute hepatitis | 0     | 0    | 0     | 0     | 0     | 0     | 0                        |
| GQ377528.1_genotype C_China_acute hepatitis | 0     | 0    | 0     | 0     | 0     | 0     | 0                        |
| GQ377529.1_genotype C_China_acute hepatitis | 0     | 0    | 0     | 0     | 0     | 0     | 0                        |
| GQ377530.1_genotype C_China_acute hepatitis | 0     | 0    | 0     | 0     | 0     | 0     | 0                        |
| GQ377531.1_genotype C_China_acute hepatitis | 0     | 0    | 0     | 0     | 0     | 0     | 0                        |
| GQ377532.1_genotype D_China_acute hepatitis | 0     | 0    | 0     | 0     | 0     | 0     | 0                        |
| GQ377533.1_genotype C_China_acute hepatitis | 0     | 0    | 0     | 0     | 0     | 0     | 0                        |
| GQ377534.1_genotype C_China_acute hepatitis | 0     | 0    | 0     | 0     | 0     | 0     | 0                        |
| GQ377535.1_genotype C_China_acute hepatitis | 0     | 0    | 0     | 0     | 0     | 0     | 0                        |
| GQ377536.1_genotype C_China_acute hepatitis | 0     | 0    | 0     | 0     | 0     | 0     | 0                        |
| GQ377537.1_genotype B_China_acute hepatitis | 0     | 0    | 0     | 0     | 0     | 0     | 0                        |
| GQ377538.1_genotype C_China_acute hepatitis | 0     | 0    | 0     | 0     | 0     | 0     | 0                        |
| GQ377539.1_genotype C_China_acute hepatitis | 0     | 0    | 0     | 0     | 0     | 0     | 0                        |
| GQ377540.1_genotype C_China_acute hepatitis | 0     | 0    | 0     | 0     | 0     | 0     | 0                        |
| GQ377541.1_genotype C_China_acute hepatitis | 0     | 0    | 0     | 0     | 0     | 0     | 0                        |
| GQ377542.1_genotype B_China_acute hepatitis | 0     | 0    | 0     | 0     | 0     | 0     | 0                        |
| GQ377543.1_genotype C_China_acute hepatitis | 0     | 0    | 0     | 0     | 0     | 0     | 0                        |
| GQ377544.1_genotype C_China_acute hepatitis | 0     | 0    | 0     | 0     | 0     | 0     | 0                        |
| GQ377545.1_genotype C_China_acute hepatitis | 0     | 0    | 0     | 0     | 0     | 0     | 0                        |

| SNP                                         | C2129 | T720 | Y2131 | T2013 | K2048 | A2512 | Total number of variants |
|---------------------------------------------|-------|------|-------|-------|-------|-------|--------------------------|
| GQ377546.1_genotype C_China_acute hepatitis | 0     | 0    | 0     | 0     | 0     | 0     | 0                        |
| GQ377547.1_genotype B_China_acute hepatitis | 0     | 0    | 0     | 0     | 0     | 0     | 0                        |
| GQ377548.1_genotype C_China_acute hepatitis | 0     | 0    | 0     | 0     | 0     | 0     | 0                        |
| GQ377549.1_genotype C_China_acute hepatitis | 0     | 0    | 0     | 0     | 0     | 0     | 0                        |
| GQ377550.1_genotype B_China_acute hepatitis | 0     | 0    | 0     | 0     | 0     | 0     | 0                        |
| GQ377551.1_genotype C_China_acute hepatitis | 0     | 0    | 0     | 0     | 0     | 0     | 0                        |
| GQ377552.1_genotype C_China_acute hepatitis | 0     | 0    | 0     | 0     | 0     | 0     | 0                        |
| GQ377553.1_genotype C_China_acute hepatitis | 0     | 0    | 0     | 0     | 0     | 0     | 0                        |
| GQ377554.1_genotype C_China_acute hepatitis | 0     | 0    | 0     | 0     | 0     | 0     | 0                        |
| GQ377555.1_genotype C_China_acute hepatitis | 0     | 0    | 0     | 0     | 0     | 0     | 0                        |
| GQ377556.1_genotype C_China_acute hepatitis | 0     | 0    | 0     | 0     | 0     | 0     | 0                        |
| GQ377557.1_genotype C_China_acute hepatitis | 0     | 0    | 0     | 0     | 0     | 0     | 0                        |
| GQ377558.1_genotype B_China_acute hepatitis | 0     | 0    | 0     | 0     | 0     | 0     | 0                        |
| GQ377559.1_genotype C_China_acute hepatitis | 0     | 0    | 0     | 0     | 0     | 0     | 0                        |
| GQ377560.1_genotype C_China_acute hepatitis | 0     | 0    | 0     | 0     | 0     | 0     | 0                        |
| GQ377561.1_genotype B_China_acute hepatitis | 0     | 0    | 0     | 0     | 0     | 0     | 0                        |
| GQ377562.1_genotype C_China_acute hepatitis | 0     | 0    | 0     | 0     | 0     | 0     | 0                        |
| GQ377563.1_genotype C_China_acute hepatitis | 0     | 0    | 0     | 0     | 0     | 0     | 0                        |
| GQ377564.1_genotype C_China_acute hepatitis | 0     | 0    | 0     | 0     | 0     | 0     | 0                        |
| GQ377565.1_genotype C_China_acute hepatitis | 0     | 0    | 0     | 0     | 0     | 0     | 0                        |
| GQ377566.1_genotype B_China_acute hepatitis | 0     | 0    | 0     | 0     | 0     | 0     | 0                        |
| GQ377567.1_genotype B_China_acute hepatitis | 0     | 0    | 0     | 0     | 0     | 0     | 0                        |
| GQ377568.1_genotype B_China_acute hepatitis | 0     | 0    | 0     | 0     | 0     | 0     | 0                        |
| GQ377569.1_genotype B_China_acute hepatitis | 0     | 0    | 0     | 0     | 0     | 0     | 0                        |
| GQ377570.1_genotype C_China_acute hepatitis | 0     | 0    | 0     | 0     | 0     | 0     | 0                        |
| GQ377571.1_genotype C_China_acute hepatitis | 0     | 0    | 0     | 0     | 0     | 0     | 0                        |
| GQ377572.1_genotype C_China_acute hepatitis | 0     | 0    | 0     | 0     | 0     | 0     | 0                        |
| GQ377573.1_genotype C_China_acute hepatitis | 0     | 0    | 0     | 0     | 0     | 0     | 0                        |
| GQ377574.1_genotype C_China_acute hepatitis | 0     | 0    | 0     | 0     | 0     | 0     | 0                        |
| GQ377575.1_genotype C_China_acute hepatitis | 0     | 0    | 0     | 0     | 0     | 0     | 0                        |
| GQ377576.1_genotype C_China_acute hepatitis | 0     | 0    | 0     | 0     | 0     | 0     | 0                        |
| GQ377577.1_genotype C_China_acute hepatitis | 0     | 0    | 0     | 0     | 0     | 0     | 0                        |

| SNP                                         | C2129 | T720 | Y2131 | T2013 | K2048 | A2512 | Total number of variants |
|---------------------------------------------|-------|------|-------|-------|-------|-------|--------------------------|
| GQ377578.1_genotype C_China_acute hepatitis | 0     | 0    | 0     | 0     | 0     | 0     | 0                        |
| GQ377579.1_genotype C_China_acute hepatitis | 0     | 0    | 0     | 0     | 0     | 0     | 0                        |
| GQ377580.1_genotype C_China_acute hepatitis | 0     | 0    | 0     | 0     | 0     | 0     | 0                        |
| GQ377581.1_genotype C_China_acute hepatitis | 0     | 0    | 0     | 0     | 0     | 0     | 0                        |
| GQ377582.1_genotype B_China_acute hepatitis | 0     | 0    | 0     | 0     | 0     | 0     | 0                        |
| GQ377583.1_genotype C_China_acute hepatitis | 0     | 0    | 0     | 0     | 0     | 0     | 0                        |
| GQ377584.1_genotype C_China_acute hepatitis | 0     | 0    | 0     | 0     | 0     | 0     | 0                        |
| GQ377585.1_genotype C_China_acute hepatitis | 0     | 0    | 0     | 0     | 0     | 0     | 0                        |
| GQ377586.1_genotype C_China_acute hepatitis | 0     | 0    | 0     | 0     | 0     | 0     | 0                        |
| GQ377587.1_genotype B_China_acute hepatitis | 0     | 0    | 0     | 0     | 0     | 0     | 0                        |
| GQ377588.1_genotype B_China_acute hepatitis | 0     | 0    | 0     | 0     | 0     | 0     | 0                        |
| GQ377589.1_genotype D_China_acute hepatitis | 0     | 0    | 0     | 0     | 0     | 0     | 0                        |
| GQ377590.1_genotype C_China_acute hepatitis | 0     | 0    | 0     | 0     | 0     | 0     | 0                        |
| GQ377591.1_genotype C_China_acute hepatitis | 0     | 0    | 0     | 0     | 0     | 0     | 0                        |
| GQ377592.1_genotype C_China_acute hepatitis | 0     | 0    | 0     | 0     | 0     | 0     | 0                        |
| GQ377593.1_genotype C_China_acute hepatitis | 0     | 0    | 0     | 0     | 0     | 0     | 0                        |
| GQ377594.1_genotype C_China_acute hepatitis | 0     | 0    | 0     | 0     | 0     | 0     | 0                        |
| GQ377595.1_genotype B_China_acute hepatitis | 0     | 0    | 0     | 0     | 0     | 0     | 0                        |
| GQ377596.1_genotype C_China_acute hepatitis | 0     | 0    | 0     | 0     | 0     | 0     | 0                        |
| GQ377597.1_genotype C_China_acute hepatitis | 0     | 0    | 0     | 0     | 0     | 0     | 0                        |
| GQ377598.1_genotype C_China_acute hepatitis | 0     | 0    | 0     | 0     | 0     | 0     | 0                        |
| GQ377599.1_genotype C_China_acute hepatitis | 0     | 0    | 0     | 0     | 0     | 0     | 0                        |
| GQ377600.1_genotype C_China_acute hepatitis | 0     | 0    | 0     | 0     | 0     | 0     | 0                        |
| GQ377601.1_genotype C_China_acute hepatitis | 0     | 0    | 0     | 0     | 0     | 0     | 0                        |
| GQ377602.1_genotype C_China_acute hepatitis | 0     | 0    | 0     | 0     | 0     | 0     | 0                        |
| GQ377603.1_genotype C_China_acute hepatitis | 0     | 0    | 0     | 0     | 0     | 0     | 0                        |
| GQ377604.1_genotype C_China_acute hepatitis | 0     | 0    | 0     | 0     | 0     | 0     | 0                        |
| GQ377605.1_genotype C_China_acute hepatitis | 0     | 0    | 0     | 0     | 0     | 0     | 0                        |
| GQ377606.1_genotype B_China_acute hepatitis | 0     | 0    | 0     | 0     | 0     | 0     | 0                        |
| GQ377607.1_genotype C_China_acute hepatitis | 0     | 0    | 0     | 0     | 0     | 0     | 0                        |
| GQ377608.1_genotype C_China_acute hepatitis | 0     | 0    | 0     | 0     | 0     | 0     | 0                        |
| GQ377609.1_genotype C_China_acute hepatitis | 0     | 0    | 0     | 0     | 0     | 0     | 0                        |

| SNP                                         | C2129 | T720 | Y2131 | T2013 | K2048 | A2512 | Total number of variants |
|---------------------------------------------|-------|------|-------|-------|-------|-------|--------------------------|
| GQ377610.1_genotype B_China_acute hepatitis | 0     | 0    | 0     | 0     | 0     | 0     | 0                        |
| GQ377611.1_genotype C_China_acute hepatitis | 0     | 0    | 0     | 0     | 0     | 0     | 0                        |
| GQ377612.1_genotype B_China_acute hepatitis | 0     | 0    | 0     | 0     | 0     | 0     | 0                        |
| GQ377613.1_genotype C_China_acute hepatitis | 0     | 0    | 0     | 0     | 0     | 0     | 0                        |
| GQ377614.1_genotype C_China_acute hepatitis | 0     | 0    | 0     | 0     | 0     | 0     | 0                        |
| GQ377615.1_genotype C_China_acute hepatitis | 0     | 0    | 0     | 0     | 0     | 0     | 0                        |
| GQ377616.1_genotype C_China_acute hepatitis | 0     | 0    | 0     | 0     | 0     | 0     | 0                        |
| GQ377617.1_genotype C_China_acute hepatitis | 0     | 0    | 0     | 0     | 0     | 0     | 0                        |
| GQ377618.1_genotype C_China_acute hepatitis | 0     | 0    | 0     | 0     | 0     | 0     | 0                        |
| GQ377619.1_genotype C_China_acute hepatitis | 0     | 0    | 0     | 0     | 0     | 0     | 0                        |
| GQ377620.1_genotype C_China_acute hepatitis | 0     | 0    | 0     | 0     | 0     | 0     | 0                        |
| GQ377621.1_genotype C_China_acute hepatitis | 0     | 0    | 0     | 0     | 0     | 0     | 0                        |
| GQ377622.1_genotype B_China_acute hepatitis | 0     | 0    | 0     | 0     | 0     | 0     | 0                        |
| GQ377623.1_genotype C_China_acute hepatitis | 0     | 0    | 0     | 0     | 0     | 0     | 0                        |
| GQ377624.1_genotype C_China_acute hepatitis | 0     | 0    | 0     | 0     | 0     | 0     | 0                        |
| GQ377625.1_genotype B_China_acute hepatitis | 0     | 0    | 0     | 0     | 0     | 0     | 0                        |
| GQ377626.1_genotype C_China_acute hepatitis | 0     | 0    | 0     | 0     | 0     | 0     | 0                        |
| GQ377627.1_genotype D_China_acute hepatitis | 0     | 0    | 0     | 0     | 0     | 0     | 0                        |
| GQ377628.1_genotype C_China_acute hepatitis | 0     | 0    | 0     | 0     | 0     | 0     | 0                        |
| GQ377629.1_genotype B_China_acute hepatitis | 0     | 0    | 0     | 0     | 0     | 0     | 0                        |
| GQ377630.1_genotype C_China_acute hepatitis | 0     | 0    | 0     | 0     | 0     | 0     | 0                        |
| GQ377631.1_genotype C_China_acute hepatitis | 0     | 0    | 0     | 0     | 0     | 0     | 0                        |
| GQ377632.1_genotype C_China_acute hepatitis | 0     | 0    | 0     | 0     | 0     | 0     | 0                        |
| GQ377633.1_genotype C_China_acute hepatitis | 0     | 0    | 0     | 0     | 0     | 0     | 0                        |
| GQ377634.1_genotype C_China_acute hepatitis | 0     | 0    | 0     | 0     | 0     | 0     | 0                        |
| GQ377635.1_genotype C_China_acute hepatitis | 0     | 0    | 0     | 0     | 0     | 0     | 0                        |
| GQ377636.1_genotype C_China_acute hepatitis | 0     | 0    | 0     | 0     | 0     | 0     | 0                        |
| GQ377637.1_genotype C_China_acute hepatitis | 0     | 0    | 0     | 0     | 0     | 0     | 0                        |
| GQ377638.1_genotype B_China_acute hepatitis | 0     | 0    | 0     | 0     | 0     | 0     | 0                        |
| GQ377639.1_genotype B_China_acute hepatitis | 0     | 0    | 0     | 0     | 0     | 0     | 0                        |
| GQ377640.1_genotype C_China_acute hepatitis | 0     | 0    | 0     | 0     | 0     | 0     | 0                        |
| GQ377641.1_genotype B_China_acute hepatitis | 0     | 0    | 0     | 0     | 0     | 0     | 0                        |



| SNP                                             | C2129 | T720 | Y2131 | T2013 | K2048 | A2512 | Total number of variants |
|-------------------------------------------------|-------|------|-------|-------|-------|-------|--------------------------|
| GQ377642.1_genotype C_China_acute hepatitis     | 0     | 0    | 0     | 0     | 0     | 0     | 0                        |
| GQ377643.1_genotype B_China_acute hepatitis     | 0     | 0    | 0     | 0     | 0     | 0     | 0                        |
| GQ377644.1_genotype B_China_acute hepatitis     | 0     | 0    | 0     | 0     | 0     | 0     | 0                        |
| LC036263.1_genotype B_Japan_acute hepatitis     | 0     | 0    | 0     | 0     | 0     | 0     | 0                        |
| KR230749.1_genotype G_UK_acute hepatitis        | 0     | 0    | 0     | 0     | 0     | 0     | 0                        |
| AB937791.1_genotype A_Japan_acute hepatitis     | 0     | 0    | 0     | 0     | 0     | 0     | 0                        |
| AB937792.1_genotype A_Japan_acute hepatitis     | 0     | 0    | 0     | 0     | 0     | 0     | 0                        |
| AB937793.1_genotype A_Japan_acute hepatitis     | 0     | 0    | 0     | 0     | 0     | 0     | 0                        |
| AB937794.1_genotype A_Japan_acute hepatitis     | 0     | 0    | 0     | 0     | 0     | 0     | 0                        |
| AB971715.1_genotype C_Japan_acute hepatitis     | 0     | 0    | 0     | 0     | 0     | 0     | 0                        |
| KJ843163.1_genotype F_Argentina_acute hepatitis | 0     | 0    | 0     | 0     | 0     | 0     | 0                        |
| KJ843164.1_genotype F_Argentina_acute hepatitis | 0     | 0    | 0     | 0     | 0     | 0     | 0                        |
| KJ843165.1_genotype B_Argentina_acute hepatitis | 0     | 0    | 0     | 0     | 0     | 0     | 0                        |
| KJ843166.1_genotype A_Argentina_acute hepatitis | 0     | 0    | 0     | 0     | 0     | 0     | 0                        |
| KJ843167.1_genotype F_Argentina_acute hepatitis | 0     | 0    | 0     | 0     | 0     | 0     | 0                        |
| KJ843168.1_genotype F_Argentina_acute hepatitis | 0     | 0    | 0     | 0     | 0     | 0     | 0                        |
| KJ843169.1_genotype F_Argentina_acute hepatitis | 0     | 0    | 0     | 0     | 0     | 0     | 0                        |
| KJ843170.1_genotype F_Argentina_acute hepatitis | 0     | 0    | 0     | 0     | 0     | 0     | 0                        |
| KJ843171.1_genotype F_Argentina_acute hepatitis | 0     | 0    | 0     | 0     | 0     | 0     | 0                        |
| KJ843172.1_genotype A_Argentina_acute hepatitis | 1     | 0    | 0     | 0     | 0     | 0     | 1                        |
| KJ843173.1_genotype A_Argentina_acute hepatitis | 0     | 0    | 0     | 0     | 0     | 0     | 0                        |
| KJ843174.1_genotype F_Argentina_acute hepatitis | 0     | 0    | 0     | 0     | 0     | 0     | 0                        |
| KJ843175.1_genotype F_Argentina_acute hepatitis | 0     | 0    | 0     | 0     | 0     | 0     | 0                        |
| KJ843176.1_genotype F_Argentina_acute hepatitis | 0     | 0    | 0     | 0     | 0     | 0     | 0                        |
| KJ843177.1_genotype F_Argentina_acute hepatitis | 0     | 0    | 0     | 0     | 0     | 0     | 0                        |
| KJ843178.1_genotype F_Argentina_acute hepatitis | 0     | 0    | 0     | 0     | 0     | 0     | 0                        |
| KJ843179.1_genotype F_Argentina_acute hepatitis | 0     | 0    | 0     | 0     | 0     | 0     | 0                        |
| KJ843180.1_genotype F_Argentina_acute hepatitis | 0     | 0    | 0     | 0     | 0     | 0     | 0                        |
| KJ843181.1_genotype F_Argentina_acute hepatitis | 0     | 0    | 0     | 0     | 0     | 0     | 0                        |
| KJ843182.1_genotype A_Argentina_acute hepatitis | 0     | 0    | 0     | 0     | 0     | 0     | 0                        |
| KJ843183.1_genotype A_Argentina_acute hepatitis | 0     | 0    | 0     | 0     | 0     | 0     | 0                        |
| KJ843184.1_genotype A_Argentina_acute hepatitis | 0     | 0    | 0     | 0     | 0     | 0     | 0                        |

| SNP                                             | C2129 | T720 | Y2131 | T2013 | K2048 | A2512 | Total number of variants |
|-------------------------------------------------|-------|------|-------|-------|-------|-------|--------------------------|
| KJ843185.1_genotype F_Argentina_acute hepatitis | 0     | 0    | 0     | 0     | 0     | 0     | 0                        |
| KJ843186.1_genotype A_Argentina_acute hepatitis | 0     | 0    | 0     | 0     | 0     | 0     | 0                        |
| KJ843187.1_genotype D_Argentina_acute hepatitis | 0     | 0    | 0     | 0     | 0     | 0     | 0                        |
| KJ843188.1_genotype A_Argentina_acute hepatitis | 0     | 0    | 0     | 0     | 0     | 0     | 0                        |
| KJ843189.1_genotype F_Argentina_acute hepatitis | 0     | 0    | 0     | 0     | 0     | 0     | 0                        |
| KJ843190.1_genotype F_Argentina_acute hepatitis | 0     | 0    | 0     | 0     | 0     | 0     | 0                        |
| KJ843191.1_genotype F_Argentina_acute hepatitis | 0     | 0    | 0     | 0     | 0     | 0     | 0                        |
| KJ843192.1_genotype A_Argentina_acute hepatitis | 0     | 0    | 0     | 0     | 0     | 0     | 0                        |
| KJ843193.1_genotype F_Argentina_acute hepatitis | 0     | 0    | 0     | 0     | 0     | 0     | 0                        |
| KJ843194.1_genotype F_Argentina_acute hepatitis | 0     | 0    | 0     | 0     | 0     | 0     | 0                        |
| KJ843195.1_genotype F_Argentina_acute hepatitis | 0     | 0    | 0     | 0     | 0     | 0     | 0                        |
| KJ843196.1_genotype F_Argentina_acute hepatitis | 0     | 0    | 0     | 0     | 0     | 0     | 0                        |
| KJ843197.1_genotype F_Argentina_acute hepatitis | 0     | 0    | 0     | 0     | 0     | 0     | 0                        |
| KJ843198.1_genotype F_Argentina_acute hepatitis | 0     | 0    | 0     | 0     | 0     | 0     | 0                        |
| KJ843199.1_genotype F_Argentina_acute hepatitis | 0     | 0    | 0     | 0     | 0     | 0     | 0                        |
| KJ843200.1_genotype F_Argentina_acute hepatitis | 0     | 0    | 0     | 0     | 0     | 0     | 0                        |
| KJ843201.1_genotype F_Argentina_acute hepatitis | 0     | 0    | 0     | 0     | 0     | 0     | 0                        |
| KJ843202.1_genotype F_Argentina_acute hepatitis | 0     | 0    | 0     | 0     | 0     | 0     | 0                        |
| KJ843203.1_genotype F_Argentina_acute hepatitis | 0     | 0    | 0     | 0     | 0     | 0     | 0                        |
| KJ843204.1_genotype F_Argentina_acute hepatitis | 0     | 0    | 0     | 0     | 0     | 0     | 0                        |
| KJ843205.1_genotype F_Argentina_acute hepatitis | 0     | 0    | 0     | 0     | 0     | 0     | 0                        |
| KJ843206.1_genotype F_Argentina_acute hepatitis | 0     | 0    | 0     | 0     | 0     | 0     | 0                        |
| KJ843207.1_genotype F_Argentina_acute hepatitis | 0     | 0    | 0     | 0     | 0     | 0     | 0                        |
| KJ843208.1_genotype F_Argentina_acute hepatitis | 0     | 0    | 0     | 0     | 0     | 0     | 0                        |
| KJ843209.1_genotype F_Argentina_acute hepatitis | 0     | 0    | 0     | 0     | 0     | 0     | 0                        |
| KJ843210.1_genotype F_Argentina_acute hepatitis | 0     | 0    | 0     | 0     | 0     | 0     | 0                        |
| KJ843211.1_genotype F_Argentina_acute hepatitis | 0     | 0    | 0     | 0     | 0     | 0     | 0                        |
| KJ843212.1_genotype F_Argentina_acute hepatitis | 0     | 0    | 0     | 0     | 0     | 0     | 0                        |
| KJ843213.1_genotype F_Argentina_acute hepatitis | 0     | 0    | 0     | 0     | 0     | 0     | 0                        |
| KJ843214.1_genotype A_Argentina_acute hepatitis | 0     | 0    | 0     | 0     | 0     | 0     | 0                        |
| KJ843215.1_genotype A_Argentina_acute hepatitis | 0     | 0    | 0     | 0     | 0     | 0     | 0                        |
| KJ843216.1_genotype A_Argentina_acute hepatitis | 0     | 0    | 0     | 0     | 0     | 0     | 0                        |

| SNP                                             | C2129 | T720 | Y2131 | T2013 | K2048 | A2512 | Total number of variants |
|-------------------------------------------------|-------|------|-------|-------|-------|-------|--------------------------|
| KJ843217.1_genotype A_Argentina_acute hepatitis | 0     | 0    | 0     | 0     | 0     | 0     | 0                        |
| KJ843218.1_genotype A_Argentina_acute hepatitis | 0     | 0    | 0     | 0     | 0     | 0     | 0                        |
| AB846650.1_genotype H_Japan_acute hepatitis     | 0     | 0    | 0     | 0     | 0     | 0     | 0                        |
| AB775198.1_genotype A_Japan_acute hepatitis     | 0     | 0    | 0     | 0     | 0     | 0     | 0                        |
| AB775199.1_genotype A_Japan_acute hepatitis     | 0     | 0    | 0     | 0     | 0     | 0     | 0                        |
| AB775200.1_genotype A_Japan_acute hepatitis     | 0     | 0    | 0     | 0     | 0     | 0     | 0                        |
| AB775201.1_genotype A_Japan_acute hepatitis     | 0     | 0    | 0     | 0     | 0     | 0     | 0                        |
| AB778116.1_genotype A_Japan_acute hepatitis     | 0     | 0    | 0     | 0     | 0     | 0     | 0                        |
| KC836877.1_genotype A_Japan_acute hepatitis     | 0     | 0    | 0     | 0     | 0     | 0     | 0                        |
| KC836878.1_genotype A_Japan_acute hepatitis     | 0     | 0    | 0     | 0     | 0     | 0     | 0                        |
| KC836879.1_genotype A_Japan_acute hepatitis     | 0     | 0    | 0     | 0     | 0     | 0     | 0                        |
| KC836880.1_genotype A_Japan_acute hepatitis     | 0     | 0    | 0     | 0     | 0     | 0     | 0                        |
| KC836881.1_genotype A_Japan_acute hepatitis     | 0     | 0    | 0     | 0     | 0     | 0     | 0                        |
| JX898686.1_genotype D_Sweden_acute hepatitis    | 0     | 0    | 0     | 0     | 0     | 0     | 0                        |
| JX898687.1_genotype D_Sweden_acute hepatitis    | 0     | 0    | 0     | 0     | 0     | 0     | 0                        |
| JX898688.1_genotype D_Sweden_acute hepatitis    | 0     | 0    | 0     | 0     | 0     | 0     | 0                        |
| JX898689.1_genotype D_Sweden_acute hepatitis    | 0     | 0    | 0     | 0     | 0     | 0     | 0                        |
| JX898690.1_genotype D_Sweden_acute hepatitis    | 0     | 0    | 0     | 0     | 0     | 0     | 0                        |
| JX898691.1_genotype D_Sweden_acute hepatitis    | 0     | 0    | 0     | 0     | 0     | 0     | 0                        |
| JX898692.1_genotype D_Sweden_acute hepatitis    | 0     | 0    | 0     | 0     | 0     | 0     | 0                        |
| JX898693.1_genotype D_Sweden_acute hepatitis    | 0     | 0    | 0     | 0     | 0     | 0     | 0                        |
| JX898694.1_genotype D_Sweden_acute hepatitis    | 0     | 0    | 0     | 0     | 0     | 0     | 0                        |
| JX898695.1_genotype D_Sweden_acute hepatitis    | 0     | 0    | 0     | 0     | 0     | 0     | 0                        |
| JX898696.1_genotype D_Sweden_acute hepatitis    | 0     | 0    | 0     | 0     | 0     | 0     | 0                        |
| JX898697.1_genotype D_Sweden_acute hepatitis    | 0     | 0    | 0     | 0     | 0     | 0     | 0                        |
| JX898698.1_genotype D_Sweden_acute hepatitis    | 0     | 0    | 0     | 0     | 0     | 0     | 0                        |
| JX898699.1_genotype D_Sweden_acute hepatitis    | 0     | 0    | 0     | 0     | 0     | 0     | 0                        |
